# Supplementary material for: Prediction models for cardiovascular disease risk in the general population: systematic review
Source: PubMed Central journal article supplement — BMJ. 2016 May 16;353:i2416. doi: 10.1136/bmj.i2416 (PMC4868251; doi:10.1136/bmj.i2416), 2016-05-16
Supplement: damj031028.ww1_default.pdf [file damj031028.ww1_default.pdf]

## Supplemental material

Supplemental Table 1: Medline search strategy.

- 1 chd risk assessment\$.mp.
- 2 cvd risk assessment\$.mp.
- 3 heart disease risk assessment\$.mp.
- 4 coronary disease risk assessment\$.mp.
- 5 cardiovascular disease risk assessment\$.mp.
- 6 cardiovascular risk assessment\$.mp.
- 7 cv risk assessment\$.mp.
- 8 cardiovascular disease\$ risk assessment\$.mp.
- 9 coronary risk assessment\$.mp.
- 10 coronary risk scor\$.mp.
- 11 heart disease risk scor\$.mp.
- 12 chd risk scor\$.mp.
- 13 cardiovascular risk scor\$.mp.
- 14 cardiovascular disease\$ risk scor\$.mp.
- 15 cvd risk scor\$.mp.
- 16 cv risk scor\$.mp.
- 17 or/1-16
- 18 cardiovascular diseases/  
19 coronary disease/  
20 cardiovascular disease\$.mp.
- 21 heart disease\$.mp.
- 22 coronary disease\$.mp.
- 23 cardiovascular risk?.mp.
- 24 coronary risk?.mp.
- 25 exp hypertension/  
26 exp hyperlipidemia/  
27 or/18-26
- 28 risk function.mp.
- 29 Risk Assessment/mt
- 30 risk functions.mp.
- 31 risk equation\$.mp.
- 32 risk chart?.mp.
- 33 (risk adj3 tool\$).mp.
- 34 risk assessment function?.mp.
- 35 risk assessor.mp.
- 36 risk appraisal\$.mp.
- 37 risk calculation\$.mp.
- 38 risk calculator\$.mp.
- 39 risk factor\$ calculator\$.mp.
- 40 risk factor\$ calculation\$.mp.
- 41 risk engine\$.mp.
- 42 risk equation\$.mp.
- 43 risk table\$.mp.
- 44 risk threshold\$.mp.
- 45 risk disc?.mp.
- 46 risk disk?.mp.
- 47 risk scoring method?.mp.

48 scoring scheme?.mp.  
49 risk scoring system?.mp.  
50 risk prediction?.mp.  
51 predictive instrument?.mp.  
52 project\$ risk?.mp.  
53 cdss.mp.  
54 or/28-53  
55 27 and 54  
56 17 or 55  
57 new zealand chart\$.mp.  
58 sheffield table\$.mp.  
59 procam.mp.  
60 General Rule to Enable Atheroma Treatment.mp.  
61 dundee guideline\$.mp.  
62 shaper scor\$.mp.  
63 (brhs adj3 score\$.mp.  
64 (brhs adj3 risk\$.mp.  
65 copenhagen risk.mp.  
66 precard.mp.  
67 (framingham adj1 (function or functions)).mp.  
68 (framingham adj2 risk).mp.  
69 framingham equation.mp.  
70 framingham model\$.mp.  
71 (busselton adj2 risk\$.mp.  
72 (busselton adj2 score\$.mp.  
73 erica risk score\$.mp.  
74 framingham scor\$.mp.  
75 dundee scor\$.mp.  
76 brhs scor\$.mp.  
77 British Regional Heart study risk scor\$.mp.  
78 brhs risk scor\$.mp.  
79 dundee risk scor\$.mp.  
80 framingham guideline\$.mp.  
81 framingham risk?.mp.  
82 new zealand table\$.mp.  
83 ncep guideline?.mp.  
84 smac guideline?.mp.  
85 copenhagen risk?.mp.  
86 or/57-85  
87 56 or 86  
88 exp decision support techniques/  
89 Diagnosis, Computer-Assisted/  
90 Decision Support Systems,Clinical/  
91 algorithms/  
92 algorithm?.mp.  
93 algorythm?.mp.  
94 decision support?.mp.  
95 predictive model?.mp.  
96 treatment decision?.mp.  
97 scoring method\$.mp.  
98 (prediction\$ adj3 method\$.mp.

99 or/88-98  
100 Risk Factors/  
101 exp Risk Assessment/  
102 (risk? adj1 assess\$).mp.  
103 risk factor?.mp.  
104 or/100-103  
105 27 and 99 and 104  
106 87 or 105  
107 stroke.mp.  
108 exp Stroke/  
109 cerebrovascular.mp. or exp Cerebrovascular Circulation/  
110 limit 106 to ed=20040101-20130601  
111 107 or 108 or 109  
112 111 and 54  
113 111 and 99 and 104  
114 112 or 113  
115 106 or 114

Supplemental Table 2: List of articles in which the development of a model was presented, the number of models that were developed in these articles and references of papers in which these models were externally validated or incremental value was assessed.

| First author, publication year                               | Number of models developed | Number of articles in which model is validated |
|--------------------------------------------------------------|----------------------------|------------------------------------------------|
| Adult Treatment Panel III 2002 <sup>1</sup>                  | 2                          | 19 <sup>2-20</sup>                             |
| Alssema 2012 <sup>21</sup>                                   | 2                          | -                                              |
| Anderson 1991a <sup>22</sup>                                 | 12                         | 28 <sup>23-50</sup>                            |
| Anderson 1991b <sup>51</sup>                                 | 4                          | 10 <sup>9 25 52-59</sup>                       |
| Arima 2009 <sup>60</sup>                                     | 1                          | -                                              |
| Asayama 2008 <sup>61</sup>                                   | 2                          | -                                              |
| Asia Pacific Cohort Studies Collaboration 2006 <sup>62</sup> | 2                          | -                                              |
| Asia Pacific Cohort Studies Collaboration 2007 <sup>63</sup> | 4                          | 1 <sup>63</sup>                                |
| Aslibekyan 2011 <sup>64</sup>                                | 2                          | 1 <sup>64</sup>                                |
| Assmann 2002 <sup>65</sup>                                   | 1                          | 6 <sup>5 7 66-69</sup>                         |
| Assmann 2007 <sup>70</sup>                                   | 3                          | 1 <sup>71</sup>                                |
| Assmann 2008 <sup>66</sup>                                   | 1                          | -                                              |
| Balkau 2004 <sup>72</sup>                                    | 8                          | -                                              |
| Bastuji 2002 <sup>23</sup>                                   | 6                          | -                                              |
| Beer 2011 <sup>73</sup>                                      | 1                          | -                                              |
| Bell 2012 <sup>74</sup>                                      | 4                          | -                                              |
| Berard 2011 <sup>75</sup>                                    | 1                          | -                                              |
| Boland 2004 <sup>76</sup>                                    | 1                          | 1 <sup>76</sup>                                |
| Bolton 2013 <sup>77</sup>                                    | 1                          | -                                              |
| Boudik 2006 <sup>52</sup>                                    | 1                          | -                                              |
| Brand 1976 <sup>78</sup>                                     | 1                          | -                                              |
| Braun 2013 <sup>79</sup>                                     | 6                          | 1 <sup>79</sup>                                |
| Brautbar 2009 <sup>80</sup>                                  | 2                          | -                                              |
| Brindle 2006 <sup>81</sup>                                   | 32                         | -                                              |

| First author, publication year    | Number of models developed | Number of articles in which model is validated |
|-----------------------------------|----------------------------|------------------------------------------------|
| Chamberlain 2011 <sup>3</sup>     | 2                          | -                                              |
| Chambless 2003 <sup>82</sup>      | 4                          | 3 <sup>83-85</sup>                             |
| Chen 2009 <sup>27</sup>           | 2                          | 1 <sup>27</sup>                                |
| Chien 2010 <sup>71</sup>          | 2                          | -                                              |
| Chien 2012 <sup>67</sup>          | 3                          | 1 <sup>67</sup>                                |
| Ciampi 2001 <sup>86</sup>         | 10                         | -                                              |
| Conroy 2003 <sup>87</sup>         | 12                         | 21 <sup>24 27 43 44 55 85 88-102</sup>         |
| Cook 2006 <sup>4</sup>            | 1                          | -                                              |
| Cooper 2005 <sup>5</sup>          | 1                          | -                                              |
| Cross 2012 <sup>103</sup>         | 1                          | 1 <sup>103</sup>                               |
| D'Agostino 1994 <sup>104</sup>    | 2                          | 1 <sup>105</sup>                               |
| D'Agostino 2000 <sup>106</sup>    | 2                          | -                                              |
| D'Agostino 2008 <sup>107</sup>    | 4                          | 15 <sup>6 20 28 43 50 53 73 108-115</sup>      |
| Davies 2010 <sup>116</sup>        | 1                          | -                                              |
| De Ruijter 2009 <sup>31</sup>     | 5                          | -                                              |
| Donfrancesco 2010 <sup>117</sup>  | 2                          | -                                              |
| Dunder 2004 <sup>7</sup>          | 1                          | -                                              |
| Duprez 2011 <sup>8</sup>          | 1                          | -                                              |
| Empana 2011 <sup>118</sup>        | 1                          | -                                              |
| Faeh 2013 <sup>119</sup>          | 2                          | -                                              |
| Ferrario 2005 <sup>69</sup>       | 1                          | -                                              |
| Folsom 2003 <sup>120</sup>        | 1                          | 1 <sup>3</sup>                                 |
| Friedland 2009 <sup>121</sup>     | 7                          | 1 <sup>121</sup>                               |
| Gaziano 2008 <sup>122</sup>       | 4                          | 1 <sup>43</sup>                                |
| Glynn 2002 <sup>123</sup>         | 2                          | -                                              |
| Hesse 2005 <sup>124</sup>         | 1                          | 1 <sup>124</sup>                               |
| Hippisley-Cox 2007 <sup>34</sup>  | 2                          | 4 <sup>28 29 33 35</sup>                       |
| Hippisley-Cox 2008b <sup>35</sup> | 2                          | 1 <sup>30</sup>                                |
| Hippisley-Cox 2010 <sup>125</sup> | 2                          | 1 <sup>30</sup>                                |
| Hoes 1993 <sup>126</sup>          | 2                          | -                                              |
| Houterman 2002 <sup>127</sup>     | 2                          | -                                              |
| Ishikawa 2009 <sup>128</sup>      | 3                          | -                                              |
| Janssen 2005 <sup>129</sup>       | 1                          | -                                              |
| Kannel 1976 <sup>130</sup>        | 2                          | -                                              |
| Keys 1972 <sup>131</sup>          | 4                          | 1 <sup>131</sup>                               |
| Knuiman 1997 <sup>132</sup>       | 4                          | -                                              |
| Knuiman 1998 <sup>133</sup>       | 2                          | -                                              |
| Koller 2012 <sup>10</sup>         | 4                          | -                                              |
| L'Italien 2000 <sup>134</sup>     | 1                          | 1 <sup>134</sup>                               |
| Larson 1995 <sup>135</sup>        | 3                          | -                                              |
| Leaverton 1987 <sup>136</sup>     | 4                          | 2 <sup>132 136</sup>                           |
| Lee 2006 <sup>137</sup>           | 2                          | -                                              |

| First author, publication year                 | Number of models developed | Number of articles in which model is validated |
|------------------------------------------------|----------------------------|------------------------------------------------|
| Lee 2008 <sup>138</sup>                        | 4                          | -                                              |
| Levy 1990 <sup>139</sup>                       | 4                          | 1 <sup>132</sup>                               |
| Liu 2004 <sup>140</sup>                        | 2                          | -                                              |
| Lloyd-Jones 2006 <sup>141</sup>                | 2                          | 1 <sup>47</sup>                                |
| Lumley 2002 <sup>142</sup>                     | 2                          | 1 <sup>143</sup>                               |
| Macfarlane 2007 <sup>144</sup>                 | 1                          | -                                              |
| Mainous 2007 <sup>93</sup>                     | 3                          | -                                              |
| Mannan 2010 <sup>145</sup>                     | 2                          | -                                              |
| Mannan 2011 <sup>146</sup>                     | 1                          | -                                              |
| Mannan 2013 <sup>147</sup>                     | 2                          | -                                              |
| Matsumoto 2009 <sup>148</sup>                  | 2                          | -                                              |
| May 2006 <sup>37</sup>                         | 2                          | -                                              |
| May 2007 <sup>149</sup>                        | 1                          | -                                              |
| McGorrian 2011 <sup>150</sup>                  | 4                          | 1 <sup>150</sup>                               |
| McNeil 2001 <sup>151</sup>                     | 1                          | -                                              |
| Menotti 1990 <sup>152</sup>                    | 1                          | -                                              |
| Menotti 1994 <sup>153</sup>                    | 1                          | 1 <sup>153</sup>                               |
| Menotti 2000 <sup>154</sup>                    | 3                          | -                                              |
| Menotti 2002 <sup>155</sup>                    | 3                          | -                                              |
| Menotti 2005 <sup>156</sup>                    | 2                          | -                                              |
| Merry 2012 <sup>94</sup>                       | 1                          | -                                              |
| Moons 2002 <sup>157</sup>                      | 3                          | -                                              |
| Nelson 2012 <sup>40</sup>                      | 1                          | 1 <sup>40</sup>                                |
| Nippon Data Research Group 2006 <sup>158</sup> | 6                          | -                                              |
| Noda 2010 <sup>159</sup>                       | 3                          | -                                              |
| Nordestgaard 2010 <sup>160</sup>               | 1                          | -                                              |
| Odell 1994 <sup>161</sup>                      | 9                          | -                                              |
| Onat 2012 <sup>162</sup>                       | 2                          | -                                              |
| Panagiotakos 2007 <sup>96</sup>                | 2                          | -                                              |
| Pencina 2009 <sup>163</sup>                    | 1                          | -                                              |
| Petersson 2009 <sup>164</sup>                  | 2                          | -                                              |
| Plichart 2011 <sup>165</sup>                   | 2                          | -                                              |
| Pocock 2001 <sup>166</sup>                     | 1                          | 1 <sup>41</sup>                                |
| Polonsky 2010 <sup>167</sup>                   | 2                          | -                                              |
| Prati 2011 <sup>168</sup>                      | 1                          | -                                              |
| Qiao 2012 <sup>169</sup>                       | 8                          | -                                              |
| Ridker 2007 <sup>15</sup>                      | 2                          | 1 <sup>20</sup>                                |
| Ridker 2008 <sup>16</sup>                      | 4                          | 1 <sup>20</sup>                                |
| Schnabel 2009 <sup>170</sup>                   | 1                          | 1 <sup>3</sup>                                 |
| Shaper 1986 <sup>171</sup>                     | 2                          | -                                              |
| Simons 2003 <sup>18</sup>                      | 2                          | 1 <sup>41</sup>                                |
| Smith 2010 <sup>172</sup>                      | 2                          | -                                              |

| First author, publication year     | Number of models developed | Number of articles in which model is validated                                   |
|------------------------------------|----------------------------|----------------------------------------------------------------------------------|
| Tanabe 2010 <sup>173</sup>         | 2                          | -                                                                                |
| Teramoto 2008 <sup>174</sup>       | 1                          | -                                                                                |
| Thomsen 2001 <sup>175</sup>        | 1                          | -                                                                                |
| Thorsen 1979 <sup>176</sup>        | 1                          | -                                                                                |
| Truett 1967 <sup>177</sup>         | 2                          | 1 <sup>78</sup>                                                                  |
| Tsang 2003 <sup>178</sup>          | 1                          | 1 <sup>178</sup>                                                                 |
| Tunstall-Pedoe 1991 <sup>179</sup> | 2                          | 1 <sup>179</sup>                                                                 |
| Vergnaud 2008 <sup>180</sup>       | 1                          | -                                                                                |
| Voss 2002 <sup>181</sup>           | 2                          | 1 <sup>182</sup>                                                                 |
| Wilson 1987 <sup>183</sup>         | 2                          | 1 <sup>67</sup>                                                                  |
| Wilson 1998 <sup>184</sup>         | 2                          | 41 <sup>2 3 15 54 68 69 88-90 93-95 98 101 103 107 138 140 180 182 185-205</sup> |
| Wolf 1991 <sup>206</sup>           | 2                          | 5 <sup>71 142 143 207 208</sup>                                                  |
| Woodward 2007 <sup>48</sup>        | 2                          | 2 <sup>34 53</sup>                                                               |
| Wu 2006 <sup>209</sup>             | 2                          | 1 <sup>209</sup>                                                                 |
| Wu 2011 <sup>210</sup>             | 2                          | -                                                                                |
| Yip 2004 <sup>211</sup>            | 1                          | -                                                                                |
| Zhang 2005 <sup>49</sup>           | 3                          | -                                                                                |
| Framingham unspecified*            | -                          | 3 <sup>84 85 212</sup>                                                           |

\*If authors explicitly stated they determined incremental value on top of the variables from a Framingham model without referencing this specific model, they were categorized under Framingham unspecified.

Supplemental Table 3: Main categories of outcomes that were used in the developed models.

| Outcome                                        | N (%)     |
|------------------------------------------------|-----------|
| Fatal or nonfatal CHD                          | 118 (33%) |
| Fatal or nonfatal CVD                          | 95 (26%)  |
| Fatal CVD                                      | 40 (11%)  |
| Fatal or nonfatal stroke                       | 29 (8%)   |
| Fatal or nonfatal MI                           | 23 (6%)   |
| Fatal CHD                                      | 21 (6%)   |
| All-cause mortality                            | 9 (2%)    |
| Atrial fibrillation                            | 4 (1%)    |
| Fatal nonCHD                                   | 4 (1%)    |
| Fatal or nonfatal stroke, TIA                  | 4 (1%)    |
| Ischemic stroke                                | 3 (1%)    |
| Fatal stroke                                   | 2 (1%)    |
| Hemorrhagic stroke                             | 2 (1%)    |
| Nonfatal MI                                    | 2 (1%)    |
| Claudication                                   | 1 (<0.5%) |
| Coronary artery bypass grafting                | 1 (<0.5%) |
| Heart failure                                  | 1 (<0.5%) |
| Ischemic stroke, TIA                           | 1 (<0.5%) |
| Nonfatal CHD                                   | 1 (<0.5%) |
| Percutaneous transluminal coronary angioplasty | 1 (<0.5%) |
| TIA                                            | 1 (<0.5%) |
| Total                                          | 363       |

CHD=coronary heart disease; CVD=cardiovascular disease; MI=myocardial infarction; TIA=transient ischemic attack.

Supplemental Table 4: Outcome definitions as extracted by reviewers, and category in which these were placed of developed models.

| Outcome category              | Definition                                                                                                                                                                                                                                                                                                                                                                                                                                                                                                                                                                      |
|-------------------------------|---------------------------------------------------------------------------------------------------------------------------------------------------------------------------------------------------------------------------------------------------------------------------------------------------------------------------------------------------------------------------------------------------------------------------------------------------------------------------------------------------------------------------------------------------------------------------------|
| Fatal or nonfatal CHD (n=118) | Any fatal/non-fatal coronary event: death from CHD or definite myocardial infarction, and any CHD, classical angina pectoris, clinical judgment of definite heart disease and etiology specified as myocardial infarction by history, and (3) follow-up clinical diagnosis of possible heart disease with etiology specified by history as myocardial infarction and any of Minnesota ECG codes 1.2, 1.3, 5.1, 5.2, 6.1, 6.2, 7.1, 7.2, 7.4, or 8.3 at the 5-year examination, or Minnesota ECG codes 1.2 or 1.3 + 5.1 or 1.3 + 5.2 at the 5-year examination but not at entry. |
|                               | CHD death or hospitalization: ICD-9 410-414                                                                                                                                                                                                                                                                                                                                                                                                                                                                                                                                     |
|                               | CHD event: a validate definite or probable hospitalized myocardial infarction, a definite CHD death, an unrecognised myocardial infarction defined by ARIC ECG readings, or coronary revascularization.                                                                                                                                                                                                                                                                                                                                                                         |
|                               | CHD hard criteria: CHD death (ICD-9 410-414 or code 428.0-1), definite MI                                                                                                                                                                                                                                                                                                                                                                                                                                                                                                       |
|                               | CHD-any criterion: CHD death (ICD-9 410-414 or code 428.0-1), fatal or non-fatal MI, angina pectoris, chronic heart disease of possible coronary origin, coronary bypass surgery, coronary angioplasty                                                                                                                                                                                                                                                                                                                                                                          |
|                               | CHD: all definite myocardial infarction, coronary insufficiency, angina pectoris and death from coronary heart disease.                                                                                                                                                                                                                                                                                                                                                                                                                                                         |
|                               | CHD: death from CHD (sudden or non-sudden), myocardial infarction, angina pectoris and coronary insufficiency                                                                                                                                                                                                                                                                                                                                                                                                                                                                   |
|                               | CHD: definite or probable myocardial infarction, silent myocardial infarction between examinations (indicated by ECG), definite CHD death, coronary revascularization                                                                                                                                                                                                                                                                                                                                                                                                           |
|                               | CHD: fatal and non-fatal myocardial infarction, angina pectoris, cardiac/sudden death, and angioplasty                                                                                                                                                                                                                                                                                                                                                                                                                                                                          |

| Outcome category | Definition                                                                                                                                                                                                                                                                                                                                                                                                                                                                                                                                                   |
|------------------|--------------------------------------------------------------------------------------------------------------------------------------------------------------------------------------------------------------------------------------------------------------------------------------------------------------------------------------------------------------------------------------------------------------------------------------------------------------------------------------------------------------------------------------------------------------|
|                  | CHD: fatal and non-fatal myocardial infarction, cardiovascular death, angina pectoris                                                                                                                                                                                                                                                                                                                                                                                                                                                                        |
|                  | CHD: ICD-9: 410-414                                                                                                                                                                                                                                                                                                                                                                                                                                                                                                                                          |
|                  | CHD: presence of angina pectoris, a history of myocardial infarction with or without accompanying Minnesota codes of the ECG, a history of myocardial revascularisation, death from heart failure of coronary origin and fatal coronary event                                                                                                                                                                                                                                                                                                                |
|                  | CHD: sudden coronary death, fatal acute myocardial infarction, nonfatal acute myocardial infarction, new major Q wave on the ECG after 5 years of follow-up (Minnesota codes 11, 12.1 to 12.7, and 12.8 plus 51 or 52) surgery for angina pectoris with CHD angiographically demonstrated                                                                                                                                                                                                                                                                    |
|                  | CHD: validated definite or probable hospitalized MI, a definite CHD death, an unrecognized MI defined by ARIC ECG readings, or coronary revascularization. The criteria for definite or probable hospitalized MI were based on combinations of chest pain symptoms, ECG changes, and cardiac enzyme levels [33,34]. The criteria for definite fatal CHD were based on chest pain symptoms, underlying cause of death from the death certificate, and any other associated hospital information or medical history, including that from the ARIC clinic visit |
|                  | Coronary artery disease                                                                                                                                                                                                                                                                                                                                                                                                                                                                                                                                      |
|                  | Coronary artery disease or coronary artery disease death (angina pectoris, myocardial infarction, coronary insufficiency)                                                                                                                                                                                                                                                                                                                                                                                                                                    |
|                  | Coronary death, MI, angina, coronary insufficiency                                                                                                                                                                                                                                                                                                                                                                                                                                                                                                           |
|                  | Coronary deaths, underlying causes of death ICD-IX codes 410-414, 798, 799, 250, 428, 440 in association with 410-414 codes in other causes were considered as suspected coronary deaths Non fatal coronary events: ICD IX 410–411 codes for suspected acute infarction and ICD IX CM 36.0-9 codes for coronary surgery revascularization.                                                                                                                                                                                                                   |
|                  | Coronary heart disease                                                                                                                                                                                                                                                                                                                                                                                                                                                                                                                                       |
|                  | Coronary heart disease (MI, CHD death, angina pectoris, coronary insufficiency)                                                                                                                                                                                                                                                                                                                                                                                                                                                                              |
|                  | Coronary heart disease events: myocardial infarction or death from coronary heart disease (ICD-9 codes 410-414).                                                                                                                                                                                                                                                                                                                                                                                                                                             |
|                  | Coronary heart disease: angina pectoris, coronary insufficiency (unstable angina), myocardial infarction, and sudden death                                                                                                                                                                                                                                                                                                                                                                                                                                   |
|                  | Coronary heart disease: angina pectoris, coronary insufficiency, myocardial infarction (recognized or not), sudden death                                                                                                                                                                                                                                                                                                                                                                                                                                     |
|                  | Coronary heart disease: angina pectoris, recognized and unrecognized myocardial infarction, coronary insufficiency, and coronary heart disease death                                                                                                                                                                                                                                                                                                                                                                                                         |
|                  | Coronary heart disease: coronary revascularization or fatal or nonfatal myocardial infarction                                                                                                                                                                                                                                                                                                                                                                                                                                                                |
|                  | Coronary heart disease: hospitalization for angina pectoris, myocardial infarction, or a CHD death (I210–I219, I251–I259, I461 and R960 ICD-10 codes), or a revascularization procedure (percutaneous intervention or coronary artery bypass- grafting).                                                                                                                                                                                                                                                                                                     |
|                  | Coronary heart disease: MI or acute coronary death                                                                                                                                                                                                                                                                                                                                                                                                                                                                                                           |
|                  | Coronary heart disease: MI, aorto-coronary bypass, angina, other forms of specifically defined ischemic cardiopathies or cardiac complications before or after surgery                                                                                                                                                                                                                                                                                                                                                                                       |
|                  | Coronary heart disease: myocardial infarction, death due to CHD, resuscitated cardiac arrest, definite or probable angina followed by coronary revascularization, and definite angina not followed by coronary revascularization                                                                                                                                                                                                                                                                                                                             |
|                  | Coronary mortality, non-fatal myocardial infarction                                                                                                                                                                                                                                                                                                                                                                                                                                                                                                          |
|                  | Definite fatal coronary heart disease or definite nonfatal myocardial infarction                                                                                                                                                                                                                                                                                                                                                                                                                                                                             |
|                  | Fatal and nonfatal CHD: angina pectoris and myocardial infarction (ICD-9 Codes: 410–414.9)                                                                                                                                                                                                                                                                                                                                                                                                                                                                   |
|                  | Fatal or non-fatal myocardial infarction, angioplasty, coronary artery bypass surgery                                                                                                                                                                                                                                                                                                                                                                                                                                                                        |
|                  | Fatal or nonfatal CHD: nonfatal definite MI, definite CHD, ECG-evident definite MI, fatal definite MI, definite CHD, possible CHD (87% fatal), and sudden death due to CHD                                                                                                                                                                                                                                                                                                                                                                                   |
|                  | First coronary heart disease event                                                                                                                                                                                                                                                                                                                                                                                                                                                                                                                           |
|                  | First major coronary event (definition reported in unavailable article)                                                                                                                                                                                                                                                                                                                                                                                                                                                                                      |
|                  | Hard CHD: acute myocardial infarction, sudden death, and other coronary deaths                                                                                                                                                                                                                                                                                                                                                                                                                                                                               |
|                  | hard CHD: death from CHD or definite myocardial infarction, and any CHD (classical angina pectoris, (2) clinical judgment of definite heart disease and etiology specified as myocardial infarction by history, and (3) follow-up clinical diagnosis of possible heart disease with etiology specified by history as myocardial                                                                                                                                                                                                                              |



| Outcome category             | Definition                                                                                                                                                                                                                                                                                                                                                                                                                                                                                                                                                                                                                                                        |
|------------------------------|-------------------------------------------------------------------------------------------------------------------------------------------------------------------------------------------------------------------------------------------------------------------------------------------------------------------------------------------------------------------------------------------------------------------------------------------------------------------------------------------------------------------------------------------------------------------------------------------------------------------------------------------------------------------|
|                              | infarction and any of Minnesota ECG codes 1.2, 1.3, 5.1, 5.2, 6.1, 6.2, 7.1, 7.2, 7.4, or 8.3 at the 5-year examination, or Minnesota ECG codes 1.2 or 1.3 + 5.1 or 1.3 + 5.2 at the 5-year examination but not at entry).                                                                                                                                                                                                                                                                                                                                                                                                                                        |
|                              | Hard CHD: myocardial infarction + CHD death                                                                                                                                                                                                                                                                                                                                                                                                                                                                                                                                                                                                                       |
|                              | Incident cases of coronary heart disease: death with an underlying or contributing cause of CHD (International classification of diseases, 10 revision codes I20–I25, I51.6) or a myocardial infarction, diagnosis of angina or coronary artery bypass or angioplasty identified in the follow-up medical record review.                                                                                                                                                                                                                                                                                                                                          |
|                              | Incident coronary heart disease: a clinical diagnosis of an acute myocardial infarction, unstable angina pectoris, a percutaneous transluminal coronary angioplasty, or coronary artery bypass grafting according to the Cardiology information system or coronary heart disease as primary or secondary cause of death according to Statistics Netherlands (ICD9 410–414 or ICD10 I20–I25).                                                                                                                                                                                                                                                                      |
|                              | Incident coronary heart disease: fatal and nonfatal myocardial infarction, percutaneous coronary intervention, coronary artery bypass graft                                                                                                                                                                                                                                                                                                                                                                                                                                                                                                                       |
|                              | Incident coronary heart disease: myocardial infarction, fatal coronary heart disease, cardiac procedure                                                                                                                                                                                                                                                                                                                                                                                                                                                                                                                                                           |
|                              | Ischemic cardiovascular disease: acute myocardial infarction, coronary death, ischemic cardiac arrest, ischemic stroke (brain infarction due to occlusion of precerebral arteries or embolic brain infarction, ICD-9 433-434)                                                                                                                                                                                                                                                                                                                                                                                                                                     |
|                              | Major coronary event: sudden cardiac death or definite fatal or nonfatal myocardial infarction on the basis of ECG and/or cardiac enzyme changes                                                                                                                                                                                                                                                                                                                                                                                                                                                                                                                  |
|                              | Major coronary event: sudden cardiac death, definite fatal or non-fatal myocardial infarction on the basis of ECG and/or cardiac enzyme changes. The detailed criteria for defining a sudden coronary death and a definite fatal or non-fatal myocardial infarction have been previously published.                                                                                                                                                                                                                                                                                                                                                               |
|                              | Major coronary events: nonfatal MI and coronary deaths                                                                                                                                                                                                                                                                                                                                                                                                                                                                                                                                                                                                            |
|                              | Major coronary events: sudden coronary death, non-sudden coronary death, definite non-fatal myocardial infarction, fatal myocardial infarction, definite fatal chronic ischemic heart disease, surgery of coronary arteries                                                                                                                                                                                                                                                                                                                                                                                                                                       |
|                              | Myocardial infarction, undergone coronary artery bypass grafting, had percutaneous coronary intervention, or had a coronary angiography or computed tomography angiography demonstrating a stenosis of at least 50% in at least 1 epicardial vessel                                                                                                                                                                                                                                                                                                                                                                                                               |
|                              | Non-fatal myocardial infarction (ECG and/or cardiac enzyme changes), fatal MI (MI 28 d before death and no known nonatherosclerotic cause of death), atherosclerotic CHD death (Chest pain 72 h before death and no known nonatherosclerotic cause of death; History of chronic ischemic heart disease in the absence of valvular heart disease or nonischemic cardiomyopathy and no known nonatherosclerotic cause of death; Death certificate consistent with atherosclerotic CHD death and no known nonatherosclerotic cause of death; Coronary death related to CHD procedures, such as PCI or CABG)                                                          |
| Fatal or nonfatal CVD (n=95) | Atherosclerotic CVD: ICD-8 D410-D414, D427, D430-438, D440-444                                                                                                                                                                                                                                                                                                                                                                                                                                                                                                                                                                                                    |
|                              | Cardiovascular disease                                                                                                                                                                                                                                                                                                                                                                                                                                                                                                                                                                                                                                            |
|                              | Cardiovascular disease event: coronary heart disease (CHD) and stroke                                                                                                                                                                                                                                                                                                                                                                                                                                                                                                                                                                                             |
|                              | Cardiovascular disease event: coronary heart disease (CHD) and stroke - Definition: referred to 5 references with different definitions                                                                                                                                                                                                                                                                                                                                                                                                                                                                                                                           |
|                              | Cardiovascular disease: coronary heart disease (angina and myocardial infarction), stroke, or transient ischaemic attacks in the term cardiovascular disease but not peripheral vascular disease. ICD-10 codes I20-I25, I63-I64.                                                                                                                                                                                                                                                                                                                                                                                                                                  |
|                              | Cardiovascular disease: coronary heart disease, congestive heart failure, cerebrovascular disease, intermittent claudication                                                                                                                                                                                                                                                                                                                                                                                                                                                                                                                                      |
|                              | Cardiovascular disease: includes coronary heart disease (angina and myocardial infarction), stroke, or transient ischaemic attacks, but not peripheral vascular disease.                                                                                                                                                                                                                                                                                                                                                                                                                                                                                          |
|                              | Cardiovascular disease: myocardial infarction, coronary heart disease, stroke, and transient ischaemic attack.                                                                                                                                                                                                                                                                                                                                                                                                                                                                                                                                                    |
|                              | Cardiovascular disease: myocardial infarction, coronary insufficiency, death resulting from coronary heart disease, angina pectoris, atherothrombotic stroke, intermittent claudication, or other cardiovascular death                                                                                                                                                                                                                                                                                                                                                                                                                                            |
|                              | Cardiovascular disease: stroke or coronary heart disease including acute myocardial infarction, silent myocardial infarction, sudden cardiac death within 1 h after onset of acute illness, coronary artery disease followed by coronary artery bypass surgery or angioplasty. Cardiovascular disease was defined as first-ever development of coronary heart disease or stroke. The criteria for a diagnosis of coronary heart disease included first-ever acute myocardial infarction, silent myocardial infarction, sudden cardiac death within 1 h after the onset of acute illness, or coronary artery disease followed by coronary artery bypass surgery or |

| Outcome category | Definition                                                                                                                                                                                                                                                                                                                                                                                                                                                                                                                                                                                                                                                                                                                                                                                                                                                                                                                                                                                                                                                                                                                                                                  |
|------------------|-----------------------------------------------------------------------------------------------------------------------------------------------------------------------------------------------------------------------------------------------------------------------------------------------------------------------------------------------------------------------------------------------------------------------------------------------------------------------------------------------------------------------------------------------------------------------------------------------------------------------------------------------------------------------------------------------------------------------------------------------------------------------------------------------------------------------------------------------------------------------------------------------------------------------------------------------------------------------------------------------------------------------------------------------------------------------------------------------------------------------------------------------------------------------------|
|                  | angioplasty. Acute myocardial infarction was diagnosed when a subject met at least two of the following criteria: (1) typical symptoms, including prolonged severe anterior chest pain; (2) abnormal cardiac enzymes more than twice the upper limit of the normal range; (3) evolving diagnostic electrocardiographic changes; and (4) morphological changes, including local asynergy of cardiac wall motion on echocardiography, persistent perfusion defect on cardiac scintigraphy, or myocardial necrosis or scars 41 cm long accompanied by coronary atherosclerosis at autopsy. Silent myocardial infarction was defined as myocardial scarring without any historical indication of clinical symptoms or abnormal cardiac enzyme changes, and was detected by electrocardiography, echocardiography, cardiac scintigraphy or autopsy. Stroke was defined as a sudden onset of nonconvulsive and focal neurological deficit persisting for 424 h. The diagnosis of stroke and the determination of its pathological type were based on the clinical history, neurological examination and all available clinical data, including brain CT/MRI and autopsy findings. |
|                  | Cardiovascular events (myocardial infarction, ischemic stroke, coronary revascularization, cardiovascular death).                                                                                                                                                                                                                                                                                                                                                                                                                                                                                                                                                                                                                                                                                                                                                                                                                                                                                                                                                                                                                                                           |
|                  | CHD, ischemic stroke and MI (ICD codes of 433–434 (I63), 410–414 (I20–I25) and 410–411 (I21–I22, I24))                                                                                                                                                                                                                                                                                                                                                                                                                                                                                                                                                                                                                                                                                                                                                                                                                                                                                                                                                                                                                                                                      |
|                  | CHF, AF, MI, coronary revascularisation, stroke, transient ischemic attack and CVD death.                                                                                                                                                                                                                                                                                                                                                                                                                                                                                                                                                                                                                                                                                                                                                                                                                                                                                                                                                                                                                                                                                   |
|                  | CVD including coronary heart disease, stroke, or peripheral vascular disease                                                                                                                                                                                                                                                                                                                                                                                                                                                                                                                                                                                                                                                                                                                                                                                                                                                                                                                                                                                                                                                                                                |
|                  | CVD-any criterion: CHD death (ICD-9 410-414 or code 428.0-1), fatal or non-fatal MI, angina pectoris, chronic heart disease of possible coronary origin, coronary bypass surgery, coronary angioplasty, cerebrovascular death (ICD-9 430-438), stroke, TIA, peripheral artery disease, intermitted claudication, aortic aneurysm, arterial surgical procedures                                                                                                                                                                                                                                                                                                                                                                                                                                                                                                                                                                                                                                                                                                                                                                                                              |
|                  | CVD: cardiovascular death, non-fatal myocardial infarction or non-fatal cerebrovascular event                                                                                                                                                                                                                                                                                                                                                                                                                                                                                                                                                                                                                                                                                                                                                                                                                                                                                                                                                                                                                                                                               |
|                  | CVD: CHD (coronary death, myocardial infarction, coronary insufficiency, and angina), cerebrovascular events (including ischaemic stroke, haemorrhagic stroke, and transient ischaemic attack), peripheral artery disease (intermittent claudication), and heart failure                                                                                                                                                                                                                                                                                                                                                                                                                                                                                                                                                                                                                                                                                                                                                                                                                                                                                                    |
|                  | CVD: CHD (coronary death, myocardial infarction, coronary insufficiency, and angina), cerebrovascular events (ischemic stroke, haemorrhagic stroke, transient ischemic attack), peripheral artery disease (intermittent claudication), heart failure.                                                                                                                                                                                                                                                                                                                                                                                                                                                                                                                                                                                                                                                                                                                                                                                                                                                                                                                       |
|                  | CVD: coronary heart disease (angina pectoris, coronary insufficiency, myocardial infarction, sudden or non-sudden death attributed to coronary disease), cerebrovascular accident (stroke, transient ischaemia, cerebral embolism, intracerebral or subarachnoid haemorrhage), intermittent claudication, and congestive heart failure                                                                                                                                                                                                                                                                                                                                                                                                                                                                                                                                                                                                                                                                                                                                                                                                                                      |
|                  | CVD: death from CHD (sudden or non-sudden), myocardial infarction, angina pectoris, coronary insufficiency, stroke and transient ischemia                                                                                                                                                                                                                                                                                                                                                                                                                                                                                                                                                                                                                                                                                                                                                                                                                                                                                                                                                                                                                                   |
|                  | CVD: death, myocardial infarction, stroke, congestive heart failure, and coronary revascularisation including coronary artery bypass grafting and percutaneous transluminal coronary angioplasty                                                                                                                                                                                                                                                                                                                                                                                                                                                                                                                                                                                                                                                                                                                                                                                                                                                                                                                                                                            |
|                  | CVD: fatal and non-fatal myocardial infarction, cardiovascular death, angina pectoris, fatal and non-fatal stroke, transient ischaemic attack and subarachnoid haemorrhage, fatal and non-fatal heart failure and cerebrovascular death of other origin                                                                                                                                                                                                                                                                                                                                                                                                                                                                                                                                                                                                                                                                                                                                                                                                                                                                                                                     |
|                  | CVD: MI, CHD death, angina pectoris, coronary insufficiency, stroke, congestive heart failure. peripheral vascular disease                                                                                                                                                                                                                                                                                                                                                                                                                                                                                                                                                                                                                                                                                                                                                                                                                                                                                                                                                                                                                                                  |
|                  | CVD: myocardial infarction, angina, stroke, coronary artery bypass surgery, percutaneous coronary intervention, heart failure, peripheral vascular disease                                                                                                                                                                                                                                                                                                                                                                                                                                                                                                                                                                                                                                                                                                                                                                                                                                                                                                                                                                                                                  |
|                  | CVD: myocardial infarction, angina, stroke, left ventricular or congestive cardiac failure, peripheral vascular event, sudden/rapid cardiac death, heart failure death or other coronary or cardiovascular death                                                                                                                                                                                                                                                                                                                                                                                                                                                                                                                                                                                                                                                                                                                                                                                                                                                                                                                                                            |
|                  | CVD: myocardial infarction, coronary death or stroke. This outcome (effectively “hard” CHD) excluded other, non-fatal forms of CHD, but included transient ischaemic attack.                                                                                                                                                                                                                                                                                                                                                                                                                                                                                                                                                                                                                                                                                                                                                                                                                                                                                                                                                                                                |
|                  | CVD: myocardial infarction, ischemic stroke, coronary revascularization procedures, deaths from cardiovascular causes                                                                                                                                                                                                                                                                                                                                                                                                                                                                                                                                                                                                                                                                                                                                                                                                                                                                                                                                                                                                                                                       |
|                  | Deaths from cardiovascular causes (ICD-9 codes 390–459, ICD-10 codes I00-I99) or any hospital discharge diagnosis post recruitment (potentially several per admission) for coronary heart disease (ICD-9 410–414, ICD-10 I20-I25) or cerebrovascular disease (ICD-9 430–438, ICD-10 G45, I60-I69), 10 11 or for coronary artery interventions (CABG or PTCA).                                                                                                                                                                                                                                                                                                                                                                                                                                                                                                                                                                                                                                                                                                                                                                                                               |
|                  | Fatal and non-fatal stroke, fatal and non-fatal myocardial infarction. The International Classification of Disease codes for stroke and TIA were 362.3, 430, 431, 433.x1, 434.x1, 435, 436, G45, H34.1, I60, I61, and I6-7 and for MI were 410, 411, and I21x.                                                                                                                                                                                                                                                                                                                                                                                                                                                                                                                                                                                                                                                                                                                                                                                                                                                                                                              |
|                  | Fatal or nonfatal CVD (myocardial infarction, percutaneous transluminal coronary angioplasty, coronary artery bypass graft, angina pectoris, stroke, claudication intermittent, peripheral intervention, or heart failure), sudden death, type 2 diabetes, and/or CKD. Cardiovascular death was defined as death due to diseases of the cardiovascular system (ICD-10: I00–I99) and sudden death (ICD-10: R96). CKD was defined                                                                                                                                                                                                                                                                                                                                                                                                                                                                                                                                                                                                                                                                                                                                             |

| Outcome category                | Definition                                                                                                                                                                                                                                                                                                                                                                                                                                                                                                                                                                                                                                                                                                                                                                                                                                                                                                                                                                                                                                                                                                                                                                                                                                                                                                                                                                                                                                                                                                                                                                                                                                                                                                                                                                                                                                                                                                                                                                                                                                                                                                                                                                                                                                                                                                  |
|---------------------------------|-------------------------------------------------------------------------------------------------------------------------------------------------------------------------------------------------------------------------------------------------------------------------------------------------------------------------------------------------------------------------------------------------------------------------------------------------------------------------------------------------------------------------------------------------------------------------------------------------------------------------------------------------------------------------------------------------------------------------------------------------------------------------------------------------------------------------------------------------------------------------------------------------------------------------------------------------------------------------------------------------------------------------------------------------------------------------------------------------------------------------------------------------------------------------------------------------------------------------------------------------------------------------------------------------------------------------------------------------------------------------------------------------------------------------------------------------------------------------------------------------------------------------------------------------------------------------------------------------------------------------------------------------------------------------------------------------------------------------------------------------------------------------------------------------------------------------------------------------------------------------------------------------------------------------------------------------------------------------------------------------------------------------------------------------------------------------------------------------------------------------------------------------------------------------------------------------------------------------------------------------------------------------------------------------------------|
|                                 | <p>by estimated glomerular filtration rate,60 mL/min/1.73 m<sup>2</sup></p> <p>Fatal/nonfatal cardiovascular events: ICD-8 and ICD-9: 410–414, 431, 433, 434, 435, 436, 437, 440, 441, ICD-10: I20–I25, I61, I63–I66, I70–I72</p> <p>First major cardiovascular event: hard coronary event (definition reported in unavailable article), hard cerebrovascular event (definition reported in unavailable article), major peripheral artery disease (manifested as fatal peripheral artery disease, or as fatal or non-fatal gangrene of the extremities, or as fatal or non-fatal aneurysm of the aorta in any anatomical site, or as surgical procedures for aortic aneurysm or for lower limb artery disease, or as any other fatal cardiovascular event attributed to arteriosclerosis)</p> <p>First occurrence of cardiovascular disease: myocardial infarction, stroke, death from cardiovascular causes, percutaneous transluminal coronary angioplasty, or coronary artery bypass graft surgery.</p> <p>Hard cardiovascular disease: recognized MI, sudden death, or atherothrombotic brain infarction</p> <p>Hard CV events: coronary death, myocardial infarction, stroke</p> <p>Incident cardiovascular disease (CHD or stroke): death with an underlying or contribution cause coded as I20–I25, I51.6, I60–I69 or G45 or a new CHD or stroke event in any woman’s medical record review.</p> <p>Major cardiovascular events: major coronary events (sudden coronary death, non-sudden coronary death, definite non-fatal myocardial infarction, fatal myocardial infarction, definite fatal chronic ischemic heart disease, surgery of coronary arteries) and cerebrovascular events (definite fatal and non-fatal haemorrhagic and thrombotic stroke, surgery of carotid arteries), plus major peripheral artery events comprising fatal and non-fatal aortic aneurysms, fatal lower limbs artery disease, surgery of aorta or lower limb arteries.</p> <p>Myocardial infarction (recognized or unrecognized), coronary heart disease, and cardiovascular disease. Specification in reference.</p> <p>Myocardial infarction, stroke, coronary revascularization procedures, or cardiovascular death</p> <p>Recognized myocardial infarction (MI) or atherothrombotic brain infarction (ABI)</p> |
| Fatal CVD (n=40)                | <p>Cardiovascular death: ICD-10 codes I00–I99</p> <p>Cardiovascular death: ICD-9 codes 401–414 and 426–443, with the exception of the 430.0, 798.1 and 798.2. Instantaneous death (ICD-9, 798.1) and death within 24 h of symptoms onset (ICD-9, 798.2)</p> <p>Cardiovascular disease mortality: myocardial infarction (definite), angina pectoris (definite), intermittent claudication (definite), stroke (definite), TIA (definite) or heart failure</p> <p>Cardiovascular mortality (ICD-10: I10 to I79)</p> <p>Cardiovascular mortality: ICD-9 codes 401 through 414 and 426 through 443, with the exception of the following ICD-9 codes for definitely non-atherosclerotic causes of death: 426.7, 429.0, 430.0, 432.1, 437.3, 437.4, and 437.5. We also classified 798.1 (instantaneous death) and 798.2 (death within 24h of symptom onset) as cardiovascular deaths.</p> <p>Cause-specific death from all CVD</p> <p>CVD death: death from MI, CHD death, angina pectoris, coronary insufficiency, stroke, congestive heart failure, peripheral vascular disease</p> <p>Fatal cardiovascular events: deaths with an underlying cause given as ICD-10 codes I10 through I15, I20 through I25, R96.0, R96.1 and I44 through I73, with the exception of I45.6, I51.4, I52, I60, I62, I67.1, I67.5 and I67.7</p> <p>Fatal CVD</p> <p>Fatal CVD event: ICD-8:390–458, until 1994; ICD-10: I00–I99, since 1995</p> <p>Fatal CVD: all deaths due to ischaemic heart disease (ICD-9 410–414) and cerebrovascular accidents (ICD-9 430–438)</p> <p>Fatal CVD: ICD-8: 390–458, ICD-10: I00–I99</p> <p>Sudden death</p>                                                                                                                                                                                                                                                                                                                                                                                                                                                                                                                                                                                                                                                                                      |
| Fatal or nonfatal stroke (n=29) | <p>fatal/non-fatal stroke of all types</p> <p>fatal/non-fatal stroke: Atherothrombotic brain infarction, Transient ischemic attack, Cerebral embolus, Intracerebral haemorrhage, Subarachnoid haemorrhage</p> <p>First major cerebrovascular event (definition reported in unavailable article)</p> <p>Major cerebrovascular events: definite fatal and non-fatal haemorrhagic and thrombotic stroke, surgery of carotid arteries</p> <p>nonfatal ischemic stroke, transient ischemic attack (TIA) or all-causes vascular death</p>                                                                                                                                                                                                                                                                                                                                                                                                                                                                                                                                                                                                                                                                                                                                                                                                                                                                                                                                                                                                                                                                                                                                                                                                                                                                                                                                                                                                                                                                                                                                                                                                                                                                                                                                                                         |

| Outcome category            | Definition                                                                                                                                                                                                                                                                                                                                                                                                                                                                                                                                                                                                                                                                                                                                                                                                                          |
|-----------------------------|-------------------------------------------------------------------------------------------------------------------------------------------------------------------------------------------------------------------------------------------------------------------------------------------------------------------------------------------------------------------------------------------------------------------------------------------------------------------------------------------------------------------------------------------------------------------------------------------------------------------------------------------------------------------------------------------------------------------------------------------------------------------------------------------------------------------------------------|
|                             | Stroke                                                                                                                                                                                                                                                                                                                                                                                                                                                                                                                                                                                                                                                                                                                                                                                                                              |
|                             | Stroke: a clinical event of rapid onset consisting of neurological deficit lasting more than 24 hours unless death supervenes, or if it lasts less than 24 hours, an appropriate lesion to explain the deficit is seen in a brain image. The event could not be directly caused by trauma to the brain, tumour, or infection. Based on the information present, the neurologist classified the event into first and recurrent stroke, and into subarachnoid haemorrhage, intracranial haemorrhage, intracerebral infarction, or unspecified stroke. Cerebral infarction was classified according to internationally accepted criteria. <sup>22 23</sup> In addition, the certainty of the diagnosis was assessed in definite, probable, possible and no stroke. The present analysis is restricted to definite and probable strokes |
|                             | Stroke: a focal, nonconvulsive neurological deficit of sudden onset that persisted for at least 24 hours. Stroke subtypes, ie, cerebral haemorrhage (CH), cerebral infarction (CI), and subarachnoid hemorrhage (SAH), were determined by using the criteria of the National Institute of Neurological Disorder and Stroke. <sup>23</sup> Symptomatic lacuna infarction was defined as a CI.                                                                                                                                                                                                                                                                                                                                                                                                                                        |
|                             | Stroke: a sudden neurological symptom of vascular origin that lasted 24 hours with supporting evidence from the image study; fatal stroke cases were included. Transient ischemic attacks were not included in this study.                                                                                                                                                                                                                                                                                                                                                                                                                                                                                                                                                                                                          |
|                             | Stroke: ICD-9-CM, 430-437, or ICD-10 I60-I69                                                                                                                                                                                                                                                                                                                                                                                                                                                                                                                                                                                                                                                                                                                                                                                        |
|                             | Stroke: including transient ischemia                                                                                                                                                                                                                                                                                                                                                                                                                                                                                                                                                                                                                                                                                                                                                                                                |
|                             | Stroke: subarachnoid haemorrhage or a neurological deficit of rapid onset lasting more than 24 hours unless death supervenes or, if less than 24 hours, an appropriate lesion to explain the deficit was seen on brain imaging                                                                                                                                                                                                                                                                                                                                                                                                                                                                                                                                                                                                      |
| Fatal or nonfatal MI (n=23) | Acute MI                                                                                                                                                                                                                                                                                                                                                                                                                                                                                                                                                                                                                                                                                                                                                                                                                            |
|                             | Acute MI: based on chest pain, cardiac enzyme levels, and electrocardiograms. These criteria were based on criteria from the MONICA study <sup>28</sup> or from the World Health Organization                                                                                                                                                                                                                                                                                                                                                                                                                                                                                                                                                                                                                                       |
|                             | Fatal or non-fatal major ischaemic heart disease: A fatal case was considered to have occurred if ischaemic heart disease (ICD codes 410-414) was recorded as the underlying cause of death. In non-fatal cases a myocardial infarction was diagnosed according to World Health Organisation criteria                                                                                                                                                                                                                                                                                                                                                                                                                                                                                                                               |
|                             | Fatal or nonfatal MI                                                                                                                                                                                                                                                                                                                                                                                                                                                                                                                                                                                                                                                                                                                                                                                                                |
|                             | Fatal or nonfatal MI: Fatal myocardial infarction was defined as cause of death with ICD-8 code 410 in the Danish National Register of Causes of Death. The nonfatal myocardial infarctions were defined as first-ever hospital admission with ICD-8 code 410 in the National Patient Register                                                                                                                                                                                                                                                                                                                                                                                                                                                                                                                                      |
|                             | Fatal or nonfatal MI: Myocardial infarction was classified as bdefiniteQ or bsuspect,Q but within these categories, further subdivisions of recognized, unrecognized, and silent were made. Truly silent MI was diagnosed based on definite ECG changes (new Minnesota Code 1) without any supporting clinical history; unrecognized MI was diagnosed based on electrocardiographic changes accompanied by symptoms, which, in retrospect, were consistent with acute MI but which had not been recognized as such at the time by either the patient or his general practitioner. The diagnosis of recognized MI was based on clinical data with or without accompanying electrocardiographic abnormalities.                                                                                                                        |
|                             | Heart attack: recognized MI or sudden death                                                                                                                                                                                                                                                                                                                                                                                                                                                                                                                                                                                                                                                                                                                                                                                         |
|                             | MI                                                                                                                                                                                                                                                                                                                                                                                                                                                                                                                                                                                                                                                                                                                                                                                                                                  |
|                             | MI (ICD 410/I21)                                                                                                                                                                                                                                                                                                                                                                                                                                                                                                                                                                                                                                                                                                                                                                                                                    |
|                             | MI: WHO; International Classification of Diseases, 8th edition: codes 410; 10th edition: codes I21- I22                                                                                                                                                                                                                                                                                                                                                                                                                                                                                                                                                                                                                                                                                                                             |
|                             | Myocardial infarction case: criteria from MONICA project                                                                                                                                                                                                                                                                                                                                                                                                                                                                                                                                                                                                                                                                                                                                                                            |
|                             | Myocardial infarction: including silent and unrecognized MI                                                                                                                                                                                                                                                                                                                                                                                                                                                                                                                                                                                                                                                                                                                                                                         |
|                             | Nonfatal or fatal definite myocardial infarction or possible myocardial infarction according to the criteria of the World Health Organization Multinational Monitoring of Trends and Determinants in Cardiovascular Disease (MONICA) Project                                                                                                                                                                                                                                                                                                                                                                                                                                                                                                                                                                                        |
|                             | Recognized myocardial infarction (MI)                                                                                                                                                                                                                                                                                                                                                                                                                                                                                                                                                                                                                                                                                                                                                                                               |
| Fatal CHD (n=21)            | Cause-specific death from CHD                                                                                                                                                                                                                                                                                                                                                                                                                                                                                                                                                                                                                                                                                                                                                                                                       |
|                             | CHD death: ICD-9 410-414                                                                                                                                                                                                                                                                                                                                                                                                                                                                                                                                                                                                                                                                                                                                                                                                            |
|                             | Coronary death: ICD-9 410-414                                                                                                                                                                                                                                                                                                                                                                                                                                                                                                                                                                                                                                                                                                                                                                                                       |
|                             | Coronary heart disease death (ICD-8 410, 411, 412.1 or 412.3)                                                                                                                                                                                                                                                                                                                                                                                                                                                                                                                                                                                                                                                                                                                                                                       |
|                             | Coronary heart disease death (ICD-9 410, 411, 412 or 414)                                                                                                                                                                                                                                                                                                                                                                                                                                                                                                                                                                                                                                                                                                                                                                           |

| Outcome category                    | Definition                                                                                                                                                                                                                                                                                                                                                                                                                                                                                                         |
|-------------------------------------|--------------------------------------------------------------------------------------------------------------------------------------------------------------------------------------------------------------------------------------------------------------------------------------------------------------------------------------------------------------------------------------------------------------------------------------------------------------------------------------------------------------------|
|                                     | Coronary heart disease death: death from MI, CHD death, angina pectoris, coronary insufficiency                                                                                                                                                                                                                                                                                                                                                                                                                    |
|                                     | Coronary heart disease mortality: death from myocardial infarction (definite) or angina pectoris (definite)                                                                                                                                                                                                                                                                                                                                                                                                        |
|                                     | Fatal coronary heart disease                                                                                                                                                                                                                                                                                                                                                                                                                                                                                       |
|                                     | Fatal coronary heart disease (ICD 410-414)                                                                                                                                                                                                                                                                                                                                                                                                                                                                         |
|                                     | Nonsudden/sudden coronary death                                                                                                                                                                                                                                                                                                                                                                                                                                                                                    |
| All-cause mortality (n=9)           | All-cause mortality                                                                                                                                                                                                                                                                                                                                                                                                                                                                                                |
| Nonfatal CHD (n=5)                  | Fatal nonCHD: ICD-9 codes 401 through 409 and 426 through 443, with the exception of the following ICD-9 codes for definitely non-atherosclerotic causes of death: 426.7, 429.0, 430.0, 432.1, 437.3, 437.4, and 437.5. We also classified 798.1 (instantaneous death) and 798.2 (death within 24h of symptom onset).                                                                                                                                                                                              |
|                                     | Non-fatal, acute myocardial infarction (ICD-9: 410.xx and 412.xx) or hospitalization for unstable angina (ICD-9: 411.1)                                                                                                                                                                                                                                                                                                                                                                                            |
| Fatal or nonfatal stroke, TIA (n=4) | Fatal and non-fatal stroke, transient ischaemic attack and subarachnoid haemorrhage                                                                                                                                                                                                                                                                                                                                                                                                                                |
|                                     | Stroke, transient ischaemic attack. The diagnostic criteria of stroke, TIA, and their subtypes were based on the system for the Classification of Cerebrovascular Disease III by the National Institute of Neurological Disorders and Stroke                                                                                                                                                                                                                                                                       |
| Atrial fibrillation (n=4)           | Atrial fibrillation: ICD-9 427.31 or 427.32                                                                                                                                                                                                                                                                                                                                                                                                                                                                        |
|                                     | Atrial fibrillation: 427.92 (ICD-8), 427D (ICD-9), and I48 (ICD-10)                                                                                                                                                                                                                                                                                                                                                                                                                                                |
|                                     | First event of atrial fibrillation: atrial flutter or atrial fibrillation was present on an electrocardiograph                                                                                                                                                                                                                                                                                                                                                                                                     |
| Ischemic stroke (n=3)               | Atherothrombotic brain infarction                                                                                                                                                                                                                                                                                                                                                                                                                                                                                  |
|                                     | Ischemic stroke                                                                                                                                                                                                                                                                                                                                                                                                                                                                                                    |
|                                     | Cerebral Infarction: criteria of the National Institute of Neurological Disorder and Stroke                                                                                                                                                                                                                                                                                                                                                                                                                        |
| Fatal stroke (n=2)                  | Cause-specific death from stroke                                                                                                                                                                                                                                                                                                                                                                                                                                                                                   |
| Haemorrhagic stroke (n=2)           | Haemorrhagic stroke                                                                                                                                                                                                                                                                                                                                                                                                                                                                                                |
|                                     | Cerebral haemorrhage: criteria of the National Institute of Neurological Disorder and Stroke                                                                                                                                                                                                                                                                                                                                                                                                                       |
| Nonfatal MI (n=2)                   | Non-fatal acute myocardial infarction                                                                                                                                                                                                                                                                                                                                                                                                                                                                              |
| Heart failure (n=1)                 | Heart failure: 427.00 (ICD-8), 427.10 (ICD-9), and 428.99 (ICD-10)                                                                                                                                                                                                                                                                                                                                                                                                                                                 |
| Ischemic stroke, TIA (n=1)          | Stroke: TIA, ischaemic stroke. A transient ischaemic attack (TIA) was defined as focal neurological symptoms of ischaemic cause that lasted less than 24 h. A definite stroke was defined as a focal neurological deficit that lasted longer than 24 h and was attributable to a vascular event. Strokes were independently classified by two neurologists into ischaemic and haemorrhagic subtypes on the basis of mode of onset, clinical findings and magnetic resonance imaging and/or computerized tomography |
| TIA (n=1)                           | TIA                                                                                                                                                                                                                                                                                                                                                                                                                                                                                                                |
| Claudication (n=1)                  | Claudication                                                                                                                                                                                                                                                                                                                                                                                                                                                                                                       |
| CABG (n=1)                          | Coronary artery bypass grafting                                                                                                                                                                                                                                                                                                                                                                                                                                                                                    |
| PTCA (n=1)                          | Percutaneous transluminal coronary angioplasty                                                                                                                                                                                                                                                                                                                                                                                                                                                                     |

CHD=coronary heart disease; CVD=cardiovascular disease; MI=myocardial infarction; TIA=transient ischemic attack; AF=atrial fibrillation; ECG=electrocardiography; ICD=International Classification of Disease; PCI= percutaneous coronary intervention; CABG=Coronary artery bypass grafting; PTCA=Percutaneous transluminal coronary angioplasty.

Supplemental Table 5: Modelling method used to develop the prediction models.

| <b>Method</b>                             | <b>N (%)</b> |
|-------------------------------------------|--------------|
| Cox proportional hazards regression       | 160 (44%)    |
| Accelerated failure time analysis         | 77 (21%)     |
| Logistic regression                       | 71 (20%)     |
| Other parametric survival model           | 7 (2%)       |
| Competing risk model                      | 4 (1%)       |
| Conditional logistic regression           | 2 (1%)       |
| Poisson regression                        | 2 (1%)       |
| Expert weighing                           | 1 (<0.5%)    |
| Neural network                            | 1 (<0.5%)    |
| Other e.g. counted number of risk factors | 2 (1%)       |
| Not reported                              | 36 (10%)     |
| <b>Total</b>                              | <b>363</b>   |

Supplemental Table 6: Prediction horizons used for developed models.

| <b>Prediction horizon</b> | <b>N (%)</b> |
|---------------------------|--------------|
| <5 years                  | 3 (1%)       |
| 5 years                   | 47 (13%)     |
| 5-10 years                | 25 (7%)      |
| 10 years                  | 209 (58%)    |
| 10-20 years               | 14 (4%)      |
| 20-30 years               | 14 (4%)      |
| >30 years                 | 2 (1%)       |
| Not reported              | 49 (13%)     |
| <b>Total</b>              | <b>363</b>   |

Supplemental Table 7: Characteristics of developed models that were and were not externally validated.

|                        |                                                      | <b>Validated (n=132)</b> |               | <b>Not validated (n=231)</b> |               |
|------------------------|------------------------------------------------------|--------------------------|---------------|------------------------------|---------------|
|                        |                                                      | <b>N (%)</b>             |               | <b>N (%)</b>                 |               |
| Study design           | Longitudinal data (e.g. cohort)                      | 123 (93%)                |               | 187 (81%)                    |               |
|                        | Cross-sectional data (e.g. case-control)             | 9 (7%)                   |               | 44 (19%)                     |               |
| Gender                 | Men                                                  | 52 (39%)                 |               | 90 (39%)                     |               |
|                        | Women                                                | 41 (31%)                 |               | 67 (29%)                     |               |
|                        | Men and women                                        | 39 (30%)                 |               | 74 (32%)                     |               |
| Prediction horizon     | <10 years                                            | 26 (20%)                 |               | 49 (21%)                     |               |
|                        | 10 years                                             | 88 (67%)                 |               | 121 (52%)                    |               |
|                        | >10 years                                            | 4 (3%)                   |               | 26 (11%)                     |               |
|                        | Not reported                                         | 14 (11%)                 |               | 35 (15%)                     |               |
| Modelling method       | Survival model                                       | 88 (67%)                 |               | 149 (65%)                    |               |
|                        | Logistic regression                                  | 32 (24%)                 |               | 39 (17%)                     |               |
|                        | Other                                                | 8 (6%)                   |               | 11 (5%)                      |               |
|                        | Not reported                                         | 4 (3%)                   |               | 22 (10%)                     |               |
| Internal validation    | Yes                                                  | 45 (34%)                 |               | 35 (15%)                     |               |
|                        | No                                                   | 87 (66%)                 |               | 196 (85%)                    |               |
| Presentation           | Model can be used for individual risk predictions    | 110 (83%)                |               | 161 (70%)                    |               |
|                        | Model cannot be used for individual risk predictions | 22 (17%)                 |               | 70 (30%)                     |               |
| Performance reported   | Discrimination                                       | 46 (35%)                 |               | 117 (51%)                    |               |
|                        | Calibration                                          | 34 (26%)                 |               | 82 (35%)                     |               |
|                        | Overall performance                                  | 27 (20%)                 |               | 8 (3%)                       |               |
|                        | Any performance measure                              | 61 (46%)                 |               | 130 (56%)                    |               |
|                        |                                                      | <b>N reported</b>        | <b>Median</b> | <b>N reported</b>            | <b>Median</b> |
| Publication year       |                                                      | 132                      | 2003          | 231                          | 2006          |
| Impact factor          |                                                      | 125                      | 6.2           | 220                          | 4.2           |
| Number of participants |                                                      | 113                      | 4,890         | 226                          | 3,513         |
| Number of events       |                                                      | 80                       | 364           | 209                          | 181           |
| Lower age limit        |                                                      | 124                      | 35            | 213                          | 35            |
| Upper age limit        |                                                      | 124                      | 74            | 213                          | 74            |
| Number of predictors   |                                                      | 130                      | 7             | 227                          | 6             |

Supplemental figures

A

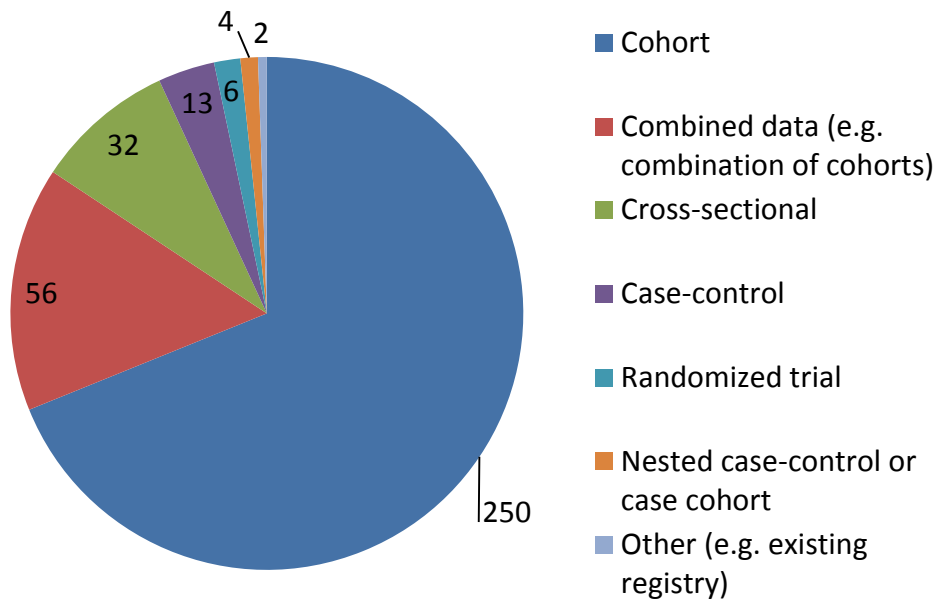

B

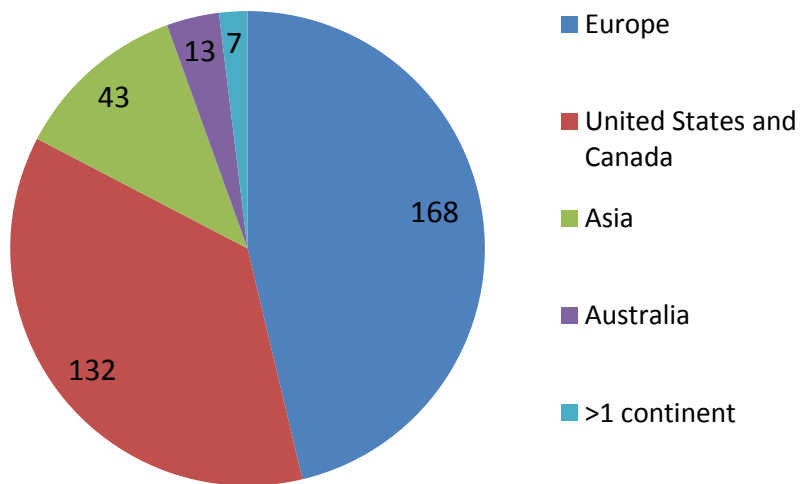



C

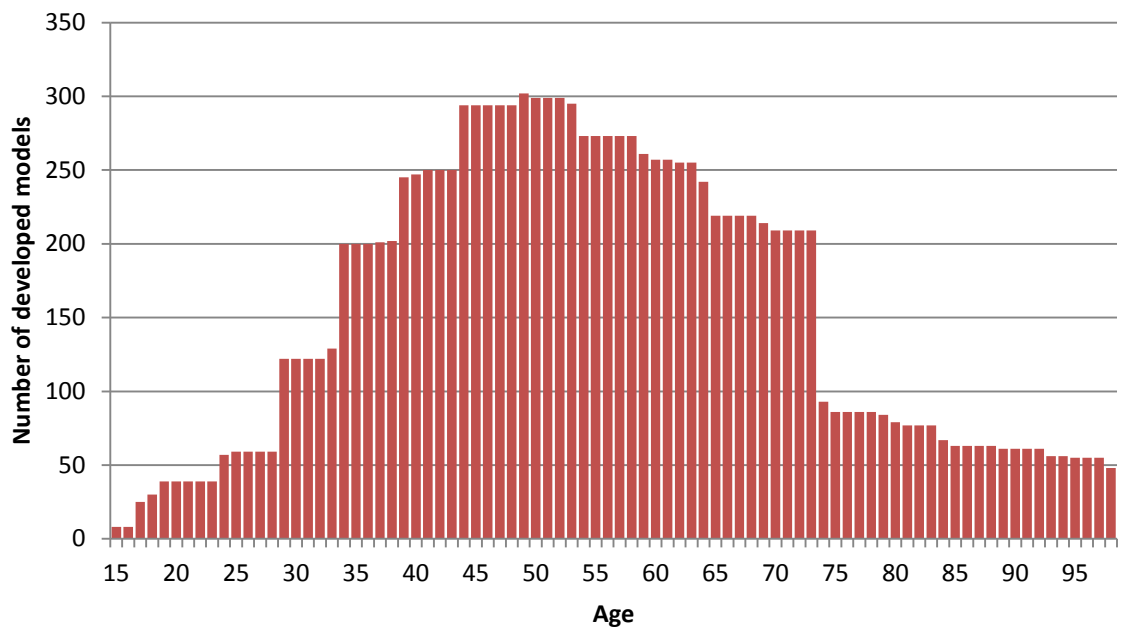

Supplemental Figure 1: Study design, location and age of included participants of all developed models. A: study design, B: location, C: age; bars indicate the number of models developed for that specific age. Models developed for e.g. age >16 were assumed to include people up to 99 years of age.

A

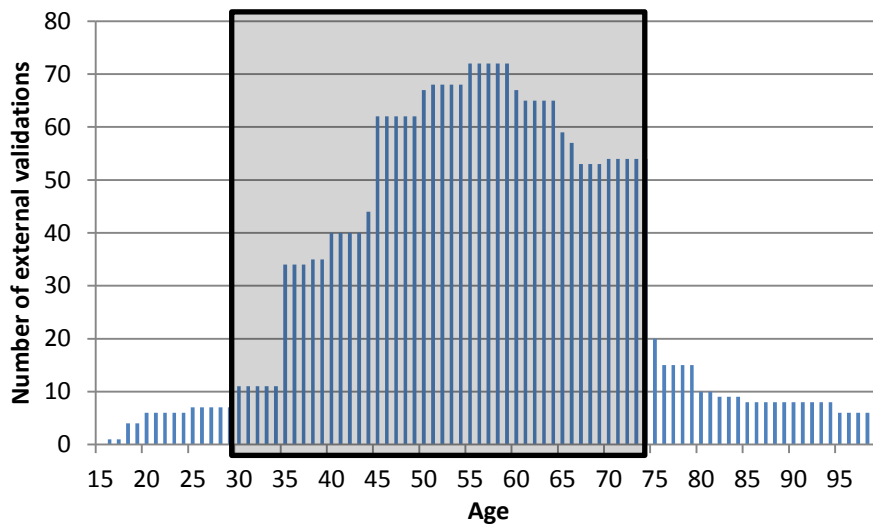

B

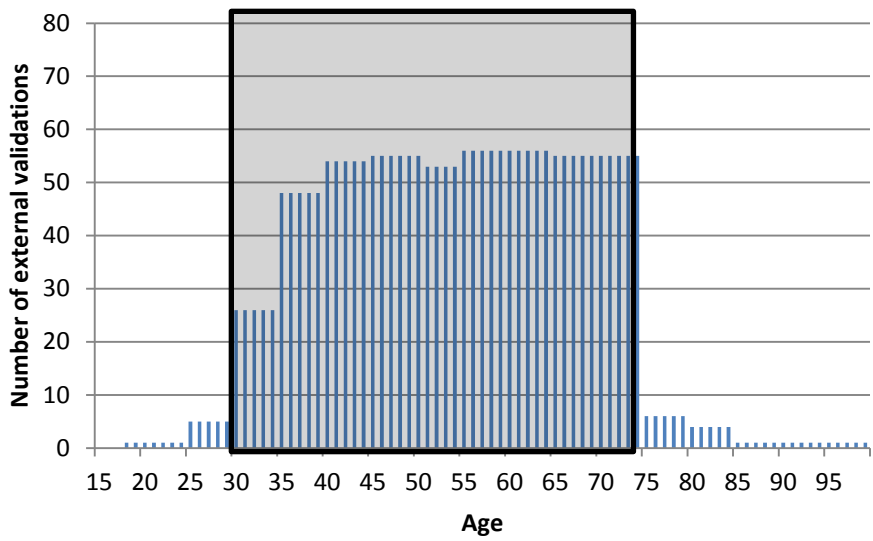

C

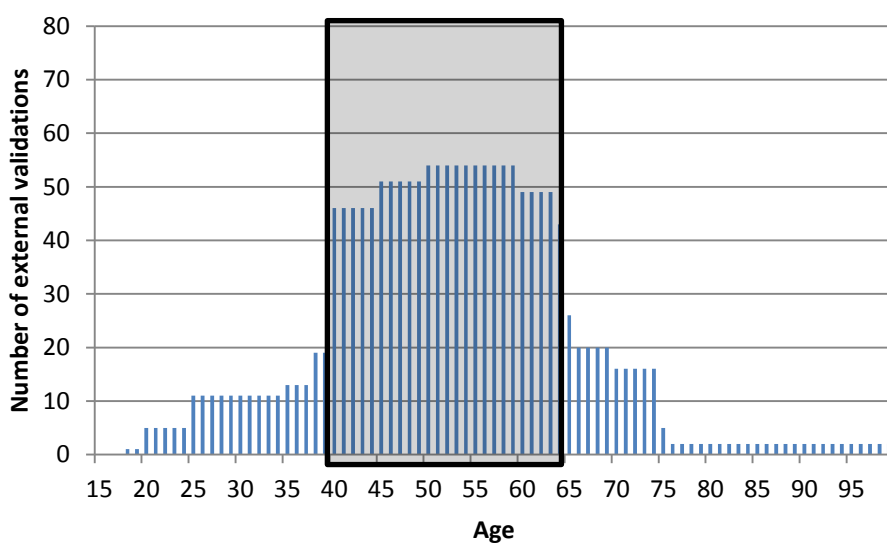

D

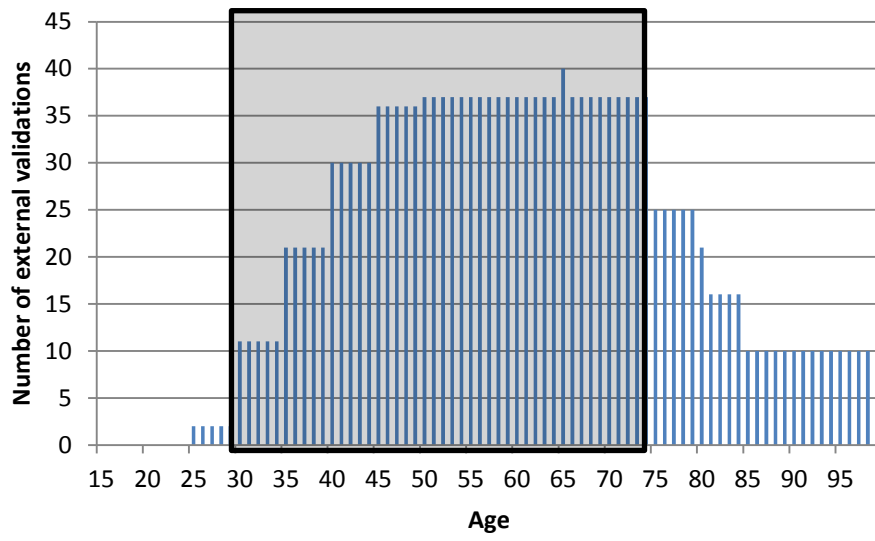

E

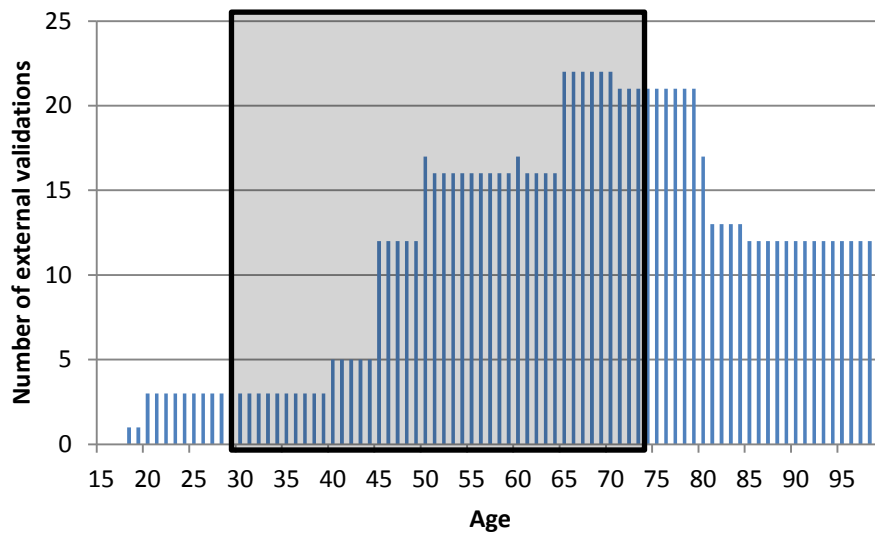

F

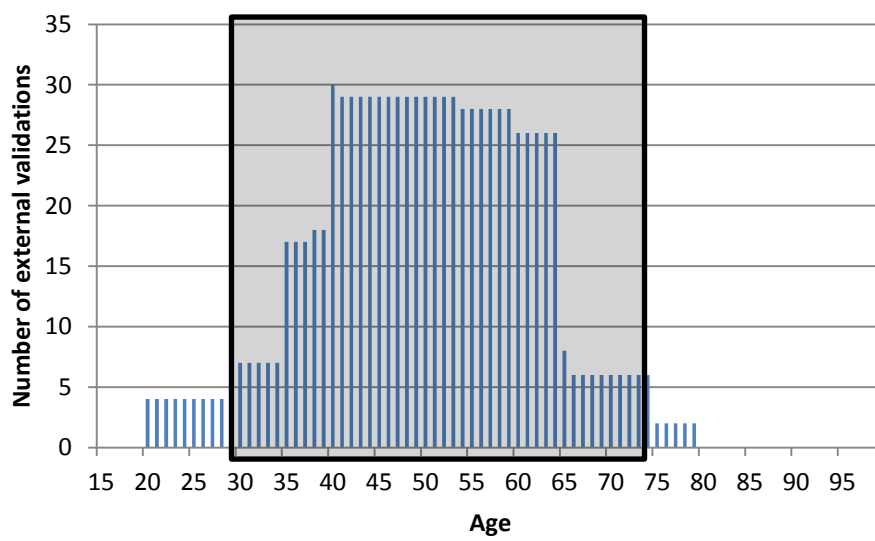

G

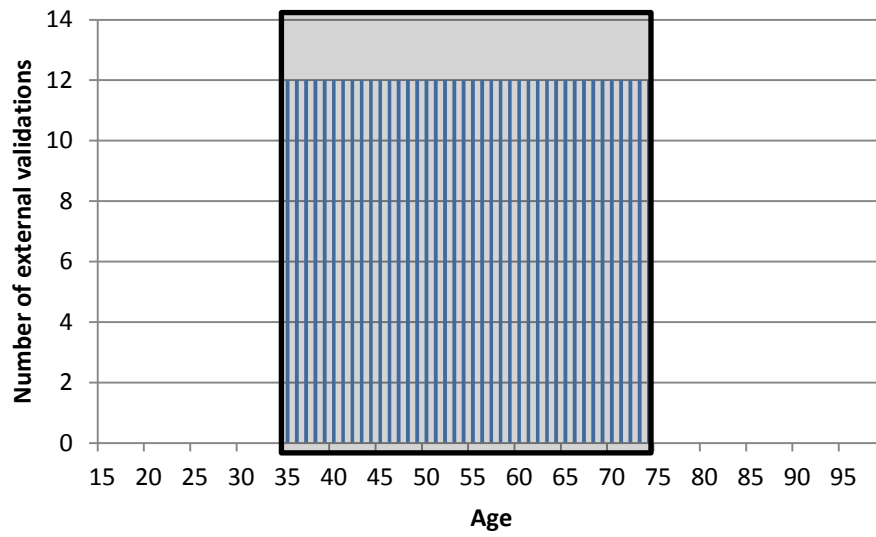

Supplemental Figure 2: Ages of people included in external validations of the 7 most often validated models (see Table 3). The grey area indicates the age range in the original development study. A: Framingham Wilson 1998,<sup>184</sup> B: Framingham Anderson 1991a,<sup>22</sup> C: SCORE Conroy 2003,<sup>87</sup> D: Framingham D'Agostino 2008,<sup>107</sup> E: Framingham ATP III 2002,<sup>1</sup> F: Framingham Anderson 1991b,<sup>51</sup> G: QRISK Hippisley-Cox 2007.<sup>34</sup>

## Reference list of included studies

1. Third Report of the National Cholesterol Education Program (NCEP) Expert Panel on Detection, Evaluation, and Treatment of High Blood Cholesterol in Adults (Adult Treatment Panel III) final report. *Circulation* 2002;106(25):3143-421.
2. Berry JD, Lloyd-Jones DM, Garside DB, Greenland P. Framingham risk score and prediction of coronary heart disease death in young men. *Am Heart J* 2007;154(1):80-6.
3. Chamberlain AM, Agarwal SK, Folsom AR, et al. A clinical risk score for atrial fibrillation in a biracial prospective cohort (from the Atherosclerosis Risk in Communities [ARIC] study). *Am J Cardiol* 2011;107(1):85-91.
4. Cook NR, Buring JE, Ridker PM. The effect of including C-reactive protein in cardiovascular risk prediction models for women. *Ann Intern Med* 2006;145(1):21-9.
5. Cooper JA, Miller GJ, Humphries SE. A comparison of the PROCAM and Framingham point-scoring systems for estimation of individual risk of coronary heart disease in the Second Northwick Park Heart Study. *Atherosclerosis* 2005;181(1):93-100.
6. Dhamoon MS, Moon YP, Paik MC, Sacco RL, Elkind MSV. The inclusion of stroke in risk stratification for primary prevention of vascular events: the Northern Manhattan Study. *Stroke* 2011;42(10):2878-82.
7. Dunder K, Lind L, Zethelius B, Berglund L, Lithell H. Evaluation of a scoring scheme, including proinsulin and the apolipoprotein B/apolipoprotein A1 ratio, for the risk of acute coronary events in middle-aged men: Uppsala Longitudinal Study of Adult Men (ULSAM). *Am Heart J* 2004;148(4):596-601.
8. Duprez DA, Florea N, Zhong W, et al. Vascular and cardiac functional and structural screening to identify risk of future morbid events: preliminary observations. *J Am Soc Hypertens* 2011;5(5):401-9.
9. Kang HM, Kim D-J. Metabolic Syndrome versus Framingham Risk Score for Association of Self-Reported Coronary Heart Disease: The 2005 Korean Health and Nutrition Examination Survey. *Diabetes Metab J* 2012;36(3):237-44.
10. Koller MT, Leening MJG, Wolbers M, et al. Development and validation of a coronary risk prediction model for older U.S. and European persons in the cardiovascular health study and the Rotterdam Study. *Ann Intern Med* 2012;157(6):389-97.
11. Koller MT, Steyerberg EW, Wolbers M, et al. Validity of the Framingham point scores in the elderly: results from the Rotterdam study. *Am Heart J* 2007;154(1):87-93.
12. Murphy TP, Dhangana R, Pencina MJ, Zafar AM, D'Agostino RB. Performance of current guidelines for coronary heart disease prevention: optimal use of the Framingham-based risk assessment. *Atherosclerosis* 2011;216(2):452-7.
13. Paynter NP, Chasman DI, Buring JE, Shiffman D, Cook NR, Ridker PM. Cardiovascular disease risk prediction with and without knowledge of genetic variation at chromosome 9p21.3. *Ann Intern Med* 2009;150(2):65-72.
14. Paynter NP, Mazer NA, Pradhan AD, Gaziano JM, Ridker PM, Cook NR. Cardiovascular risk prediction in diabetic men and women using hemoglobin A1c vs diabetes as a high-risk equivalent. *Arch Intern Med* 2011;171(19):1712-8.
15. Ridker PM, Buring JE, Rifai N, Cook NR. Development and validation of improved algorithms for the assessment of global cardiovascular risk in women: the Reynolds Risk Score. *JAMA* 2007;297(6):611-9.
16. Ridker PM, Paynter NP, Rifai N, Gaziano JM, Cook NR. C-reactive protein and parental history improve global cardiovascular risk prediction: the Reynolds Risk Score for men. *Circulation* 2008;118(22):2243-51, 4p following 51.
17. Rifkin DE, Ix JH, Wassel CL, Criqui MH, Allison MA. Renal artery calcification and mortality among clinically asymptomatic adults. *J Am Coll Cardiol* 2012;60(12):1079-85.

18. Simons LA, Simons J, Friedlander Y, McCallum J, Palaniappan L. Risk functions for prediction of cardiovascular disease in elderly Australians: the Dubbo Study. *Med J Aust* 2003;178(3):113-6.
19. Veeranna V, Zalawadiya SK, Niraj A, et al. Homocysteine and reclassification of cardiovascular disease risk. *J Am Coll Cardiol* 2011;58(10):1025-33.
20. Cook NR, Paynter NP, Eaton CB, et al. Comparison of the Framingham and Reynolds Risk scores for global cardiovascular risk prediction in the multiethnic Women's Health Initiative. *Circulation* 2012;125(14):1748-56, S1-11.
21. Alsema M, Newson RS, Bakker SJL, et al. One risk assessment tool for cardiovascular disease, type 2 diabetes, and chronic kidney disease. *Diabetes Care* 2012;35(4):741-8.
22. Anderson KM, Odell PM, Wilson PW, Kannel WB. Cardiovascular disease risk profiles. *Am Heart J* 1991;121(1 Pt 2):293-8.
23. Bastuji-Garin S, Deverly A, Moyses D, et al. The Framingham prediction rule is not valid in a European population of treated hypertensive patients. *J Hypertens* 2002;20(10):1973-80.
24. Bhopal R, Fischbacher C, Vartiainen E, Unwin N, White M, Alberti G. Predicted and observed cardiovascular disease in South Asians: application of FINRISK, Framingham and SCORE models to Newcastle Heart Project data. *J Public Health* 2005;27(1):93-100.
25. Brindle P, Emberson J, Lampe F, et al. Predictive accuracy of the Framingham coronary risk score in British men: prospective cohort study. *BMJ* 2003;327(7426):1267.
26. Brindle PM, McConnachie A, Upton MN, Hart CL, Davey Smith G, Watt GCM. The accuracy of the Framingham risk-score in different socioeconomic groups: a prospective study. *Br J Gen Pract* 2005;55(520):838-45.
27. Chen L, Tonkin AM, Moon L, et al. Recalibration and validation of the SCORE risk chart in the Australian population: the AusSCORE chart. *Eur J Cardiovasc Prev Rehabil* 2009;16(5):562-70.
28. Collins GS, Altman DG. An independent external validation and evaluation of QRISK cardiovascular risk prediction: a prospective open cohort study. *BMJ* 2009;339:b2584.
29. Collins GS, Altman DG. An independent and external validation of QRISK2 cardiovascular disease risk score: a prospective open cohort study. *BMJ* 2010;340:c2442.
30. Collins GS, Altman DG. Predicting the 10 year risk of cardiovascular disease in the United Kingdom: independent and external validation of an updated version of QRISK2. *BMJ* 2012;344:e4181.
31. de Ruijter W, Westendorp RGJ, Assendelft WJJ, et al. Use of Framingham risk score and new biomarkers to predict cardiovascular mortality in older people: population based observational cohort study. *BMJ* 2009;338:a3083.
32. Hense HW, Schulte H, Lowel H, Assmann G, Keil U. Framingham risk function overestimates risk of coronary heart disease in men and women from Germany--results from the MONICA Augsburg and the PROCAM cohorts. *Eur Heart J* 2003;24(10):937-45.
33. Hippisley-Cox J, Coupland C, Vinogradova Y, Robson J, Brindle P. Performance of the QRISK cardiovascular risk prediction algorithm in an independent UK sample of patients from general practice: a validation study. *Heart* 2008;94(1):34-9.
34. Hippisley-Cox J, Coupland C, Vinogradova Y, Robson J, May M, Brindle P. Derivation and validation of QRISK, a new cardiovascular disease risk score for the United Kingdom: prospective open cohort study. *BMJ* 2007;335(7611):136.
35. Hippisley-Cox J, Coupland C, Vinogradova Y, et al. Predicting cardiovascular risk in England and Wales: prospective derivation and validation of QRISK2. *BMJ* 2008;336(7659):1475-82.
36. Marshall T. Identification of patients for clinical risk assessment by prediction of cardiovascular risk using default risk factor values. *BMC Public Health* 2008;8:25.
37. May M, Lawlor DA, Brindle P, Patel R, Ebrahim S. Cardiovascular disease risk assessment in older women: can we improve on Framingham? British Women's Heart and Health prospective cohort study. *Heart* 2006;92(10):1396-401.

38. Milne R, Gamble G, Whitlock G, Jackson R. Discriminative ability of a risk-prediction tool derived from the Framingham Heart Study compared with single risk factors. *N Z Med J* 2003;116(1185):U663.
39. Milne R, Gamble G, Whitlock G, Jackson R. Framingham Heart Study risk equation predicts first cardiovascular event rates in New Zealanders at the population level. *N Z Med J* 2003;116(1185):U662.
40. Nelson MR, Ramsay E, Ryan P, et al. A score for the prediction of cardiovascular events in the hypertensive aged. *Am J Hypertens* 2012;25(2):190-4.
41. Nelson MR, Ryan P, Tonkin AM, et al. Prediction of cardiovascular events in subjects in the second Australian National Blood Pressure study. *Hypertension* 2010;56(1):44-8.
42. Orford JL, Sesso HD, Stedman M, Gagnon D, Vokonas P, Gaziano JM. A comparison of the Framingham and European Society of Cardiology coronary heart disease risk prediction models in the normative aging study. *Am Heart J* 2002;144(1):95-100.
43. Pandya A, Weinstein MC, Gaziano TA. A comparative assessment of non-laboratory-based versus commonly used laboratory-based cardiovascular disease risk scores in the NHANES III population. *PLoS ONE* 2011;6(5):e20416.
44. Ramsay SE, Morris RW, Whincup PH, Papacosta AO, Thomas MC, Wannamethee SG. Prediction of coronary heart disease risk by Framingham and SCORE risk assessments varies by socioeconomic position: results from a study in British men. *Eur J Cardiovasc Prev Rehabil* 2011;18(2):186-93.
45. Riddell T, Wells S, Jackson R, et al. Performance of Framingham cardiovascular risk scores by ethnic groups in New Zealand: PREDICT CVD-10. *N Z Med J* 2010;123(1309):50-61.
46. Tunstall-Pedoe H, Woodward M, estimation Sgor. By neglecting deprivation, cardiovascular risk scoring will exacerbate social gradients in disease. *Heart* 2006;92(3):307-10.
47. Villines TC, Taylor AJ. Multi-ethnic study of atherosclerosis arterial age versus framingham 10-year or lifetime cardiovascular risk. *Am J Cardiol* 2012;110(11):1627-30.
48. Woodward M, Brindle P, Tunstall-Pedoe H, estimation Sgor. Adding social deprivation and family history to cardiovascular risk assessment: the ASSIGN score from the Scottish Heart Health Extended Cohort (SHHEC). *Heart* 2007;93(2):172-6.
49. Zhang X-F, Attia J, D'Este C, Yu X-H, Wu X-G. A risk score predicted coronary heart disease and stroke in a Chinese cohort. *J Clin Epidemiol* 2005;58(9):951-8.
50. Zomer E, Owen A, Magliano DJ, Liew D, Reid C. Validation of two Framingham cardiovascular risk prediction algorithms in an Australian population: the 'old' versus the 'new' Framingham equation. *Eur J Cardiovasc Prev Rehabil* 2011;18(1):115-20.
51. Anderson KM, Wilson PW, Odell PM, Kannel WB. An updated coronary risk profile. A statement for health professionals. *Circulation* 1991;83(1):356-62.
52. Boudik F, Reissigova J, Hrach K, et al. Primary prevention of coronary artery disease among middle aged men in Prague: twenty-year follow-up results. *Atherosclerosis* 2006;184(1):86-93.
53. de la Iglesia B, Potter JF, Poulter NR, Robins MM, Skinner J. Performance of the ASSIGN cardiovascular disease risk score on a UK cohort of patients from general practice. *Heart* 2011;97(6):491-9.
54. Jimenez-Corona A, Lopez-Ridaura R, Williams K, Gonzalez-Villalpando ME, Simon J, Gonzalez-Villalpando C. Applicability of Framingham risk equations for studying a low-income Mexican population. *Salud Publica Mex* 2009;51(4):298-305.
55. Ketola E, Laatikainen T, Vartiainen E. Evaluating risk for cardiovascular diseases--vain or value? How do different cardiovascular risk scores act in real life. *Eur J Public Health* 2010;20(1):107-12.
56. Laurier D, Nguyen PC, Cazelles B, Segond P. Estimation of CHD risk in a French working population using a modified Framingham model. The PCV-METRA Group. *J Clin Epidemiol* 1994;47(12):1353-64.

57. Ramachandran S, French JM, Vanderpump MP, Croft P, Neary RH. Using the Framingham model to predict heart disease in the United Kingdom: retrospective study. *BMJ* 2000;320(7236):676-7.
58. Wang Z, Hoy WE. Is the Framingham coronary heart disease absolute risk function applicable to Aboriginal people? *Med J Aust* 2005;182(2):66-9.
59. Wannamethee SG, Shaper AG, Lennon L, Morris RW. Metabolic syndrome vs Framingham Risk Score for prediction of coronary heart disease, stroke, and type 2 diabetes mellitus. *Arch Intern Med* 2005;165(22):2644-50.
60. Arima H, Yonemoto K, Doi Y, et al. Development and validation of a cardiovascular risk prediction model for Japanese: the Hisayama study. *Hypertens Res-Clin E* 2009;32(12):1119-22.
61. Asayama K, Ohkubo T, Sato A, et al. Proposal of a risk-stratification system for the Japanese population based on blood pressure levels: the Ohasama study. *Hypertens Res-Clin E* 2008;31(7):1315-22.
62. Asia Pacific Cohort Studies Collaboration. Coronary risk prediction for those with and without diabetes. *Eur J Cardiovasc Prev Rehabil* 2006;13(1):30-6.
63. Asia Pacific Cohort Studies Collaboration, Barzi F, Patel A, et al. Cardiovascular risk prediction tools for populations in Asia. *J Epidemiol Community Health* 2007;61(2):115-21.
64. Aslibekyan S, Campos H, Loucks EB, Linkletter CD, Ordovas JM, Baylin A. Development of a cardiovascular risk score for use in low- and middle-income countries. *J Nutr* 2011;141(7):1375-80.
65. Assmann G, Cullen P, Schulte H. Simple scoring scheme for calculating the risk of acute coronary events based on the 10-year follow-up of the prospective cardiovascular Munster (PROCAM) study. *Circulation* 2002;105(3):310-5.
66. Assmann G, Schulte H, Seedorf U. Cardiovascular risk assessment in the metabolic syndrome: results from the Prospective Cardiovascular Munster (PROCAM) Study. *Int J Obes* 2008;32 Suppl 2:S11-6.
67. Chien KL, Hsu HC, Su TC, et al. Constructing a point-based prediction model for the risk of coronary artery disease in a Chinese community: A report from a cohort study in Taiwan. *Int J Cardiol* 2012;157(2):263-68.
68. Empana JP, Ducimetiere P, Arveiler D, et al. Are the Framingham and PROCAM coronary heart disease risk functions applicable to different European populations? The PRIME Study. *Eur Heart J* 2003;24(21):1903-11.
69. Ferrario M, Chiodini P, Chambless LE, et al. Prediction of coronary events in a low incidence population. Assessing accuracy of the CUORE Cohort Study prediction equation. *Int J Epidemiol* 2005;34(2):413-21.
70. Assmann G, Schulte H, Cullen P, Seedorf U. Assessing risk of myocardial infarction and stroke: new data from the Prospective Cardiovascular Munster (PROCAM) study. *Eur J Clin Invest* 2007;37(12):925-32.
71. Chien KL, Su TC, Hsu HC, et al. Constructing the prediction model for the risk of stroke in a Chinese population: report from a cohort study in Taiwan. *Stroke* 2010;41(9):1858-64.
72. Balkau B, Hu G, Qiao Q, et al. Prediction of the risk of cardiovascular mortality using a score that includes glucose as a risk factor. The DECODE Study. *Diabetologia* 2004;47(12):2118-28.
73. Beer C, Alfonso H, Flicker L, Norman PE, Hankey GJ, Almeida OP. Traditional risk factors for incident cardiovascular events have limited importance in later life compared with the health in men study cardiovascular risk score. *Stroke* 2011;42(4):952-9.
74. Bell K, Hayen A, McGeechan K, Neal B, Irwig L. Effects of additional blood pressure and lipid measurements on the prediction of cardiovascular risk. *Eur J Prev Cardiol* 2012;19(6):1474-85.
75. Berard E, Bongard V, Arveiler D, et al. Ten-year risk of all-cause mortality: assessment of a risk prediction algorithm in a French general population. *Eur J Epidemiol* 2011;26(5):359-68.



76. Boland B, De Muylder R, Goderis G, et al. Cardiovascular prevention in general practice: development and validation of an algorithm. *Acta Cardiol* 2004;59(6):598-605.
77. Bolton JL, Stewart MCW, Wilson JF, Anderson N, Price JF. Improvement in Prediction of Coronary Heart Disease Risk over Conventional Risk Factors Using SNPs Identified in Genome-Wide Association Studies. *PLoS ONE* 2013;8(2).
78. Brand RJ, Rosenman RH, Sholtz RI, Friedman M. Multivariate prediction of coronary heart disease in the Western Collaborative Group Study compared to the findings of the Framingham study. *Circulation* 1976;53(2):348-55.
79. Braun J, Bopp M, Faeh D. Blood glucose may be an alternative to cholesterol in CVD risk prediction charts. *Cardiovasc Diabetol* 2013;12(1).
80. Brautbar A, Ballantyne CM, Lawson K, et al. Impact of adding a single allele in the 9p21 locus to traditional risk factors on reclassification of coronary heart disease risk and implications for lipid-modifying therapy in the Atherosclerosis Risk in Communities study. *Circ Cardiovasc Genet* 2009;2(3):279-85.
81. Brindle P, May M, Gill P, et al. Primary prevention of cardiovascular disease: a web-based risk score for seven British black and minority ethnic groups. *Heart* 2006;92(11):1595-602.
82. Chambless LE, Folsom AR, Sharrett AR, et al. Coronary heart disease risk prediction in the Atherosclerosis Risk in Communities (ARIC) study. *J Clin Epidemiol* 2003;56(9):880-90.
83. Nambi V, Boerwinkle E, Lawson K, et al. The 9p21 genetic variant is additive to carotid intima media thickness and plaque in improving coronary heart disease risk prediction in white participants of the Atherosclerosis Risk in Communities (ARIC) Study. *Atherosclerosis* 2012;222(1):135-7.
84. Nambi V, Chambless L, Folsom AR, et al. Carotid intima-media thickness and presence or absence of plaque improves prediction of coronary heart disease risk: the ARIC (Atherosclerosis Risk In Communities) study. *J Am Coll Cardiol* 2010;55(15):1600-7.
85. Nambi V, Chambless L, He M, et al. Common carotid artery intima-media thickness is as good as carotid intima-media thickness of all carotid artery segments in improving prediction of coronary heart disease risk in the Atherosclerosis Risk in Communities (ARIC) study. *Eur Heart J* 2012;33(2):183-90.
86. Ciampi A, Courteau J, Niyonsenga T, Xhignesse M, Lussier-Cacan S, Roy M. Family history and the risk of coronary heart disease: comparing predictive models. *Eur J Epidemiol* 2001;17(7):609-20.
87. Conroy RM, Pyorala K, Fitzgerald AP, et al. Estimation of ten-year risk of fatal cardiovascular disease in Europe: the SCORE project. *Eur Heart J* 2003;24(11):987-1003.
88. Aktas MK, Ozduran V, Pothier CE, Lang R, Lauer MS. Global risk scores and exercise testing for predicting all-cause mortality in a preventive medicine program. *JAMA* 2004;292(12):1462-8.
89. Barroso LC, Muro EC, Herrera ND, Ochoa GF, Hueros JIC, Buitrago F. Performance of the Framingham and SCORE cardiovascular risk prediction functions in a non-diabetic population of a Spanish health care centre: a validation study. *Scand J Prim Health Care* 2010;28(4):242-8.
90. Comin E, Solanas P, Cabezas C, et al. Estimating cardiovascular risk in Spain using different algorithms. *Rev Esp Cardiol* 2007;60(7):693-702.
91. De Bacquer D, De Backer G. Predictive ability of the SCORE Belgium risk chart for cardiovascular mortality. *Int J Cardiol* 2010;143(3):385-90.
92. Lindman AS, Veierod MB, Pedersen JI, Tverdal A, Njolstad I, Selmer R. The ability of the SCORE high-risk model to predict 10-year cardiovascular disease mortality in Norway. *Eur J Cardiovasc Prev Rehabil* 2007;14(4):501-7.
93. Mainous AG, 3rd, Koopman RJ, Diaz VA, Everett CJ, Wilson PWF, Tilley BC. A coronary heart disease risk score based on patient-reported information. *Am J Cardiol* 2007;99(9):1236-41.

94. Merry AHH, Boer JMA, Schouten LJ, et al. Risk prediction of incident coronary heart disease in The Netherlands: re-estimation and improvement of the SCORE risk function. *Eur J Prev Cardiol* 2012;19(4):840-8.
95. Nielsen M, Ganz M, Lauze F, et al. Distribution, size, shape, growth potential and extent of abdominal aortic calcified deposits predict mortality in postmenopausal women. *BMC Cardiovasc Disord* 2010;10:56.
96. Panagiotakos DB, Fitzgerald AP, Pitsavos C, Pipilis A, Graham I, Stefanadis C. Statistical modelling of 10-year fatal cardiovascular disease risk in Greece: the HellenicSCORE (a calibration of the ESC SCORE project). *Hellenic J Cardiol* 2007;48(2):55-63.
97. Saidj M, Jorgensen T, Prescott E, Borglykke A. Poor predictive ability of the risk chart SCORE in a Danish population. *Dan Med J* 2013;60(5).
98. Scheltens T, Verschuren WMM, Boshuizen HC, et al. Estimation of cardiovascular risk: a comparison between the Framingham and the SCORE model in people under 60 years of age. *Eur J Cardiovasc Prev Rehabil* 2008;15(5):562-6.
99. Stenlund H, Lonnberg G, Jenkins P, et al. Fewer deaths from cardiovascular disease than expected from the Systematic Coronary Risk Evaluation chart in a Swedish population. *Eur J Cardiovasc Prev Rehabil* 2009;16(3):321-4.
100. Ulmer H, Kollerits B, Kelleher C, Diem G, Concin H. Predictive accuracy of the SCORE risk function for cardiovascular disease in clinical practice: a prospective evaluation of 44 649 Austrian men and women. *Eur J Cardiovasc Prev Rehabil* 2005;12(5):433-41.
101. van der Heijden AAWA, Ortegon MM, Niessen LW, Nijpels G, Dekker JM. Prediction of coronary heart disease risk in a general, pre-diabetic, and diabetic population during 10 years of follow-up: accuracy of the Framingham, SCORE, and UKPDS risk functions: The Hoorn Study. *Diabetes Care* 2009;32(11):2094-8.
102. van Dis I, Kromhout D, Geleijnse JM, Boer JMA, Verschuren WMM. Evaluation of cardiovascular risk predicted by different SCORE equations: the Netherlands as an example. *Eur J Cardiovasc Prev Rehabil* 2010;17(2):244-9.
103. Cross DS, McCarty CA, Hytopoulos E, et al. Coronary risk assessment among intermediate risk patients using a clinical and biomarker based algorithm developed and validated in two population cohorts. *Curr Med Res Opin* 2012;28(11):1819-30.
104. D'Agostino RB, Wolf PA, Belanger AJ, Kannel WB. Stroke risk profile: adjustment for antihypertensive medication. The Framingham Study. *Stroke* 1994;25(1):40-3.
105. Bineau S, Dufouil C, Helmer C, et al. Framingham stroke risk function in a large population-based cohort of elderly people: the 3C study. *Stroke* 2009;40(5):1564-70.
106. D'Agostino RB, Russell MW, Huse DM, et al. Primary and subsequent coronary risk appraisal: new results from the Framingham study. *Am Heart J* 2000;139(2 Pt 1):272-81.
107. D'Agostino RB, Sr., Vasan RS, Pencina MJ, et al. General cardiovascular risk profile for use in primary care: the Framingham Heart Study. *Circulation* 2008;117(6):743-53.
108. Bozorgmanesh M, Hadaegh F, Azizi F. Predictive accuracy of the 'Framingham's general CVD algorithm' in a Middle Eastern population: Tehran Lipid and Glucose Study. *Int J Clin Pract* 2011;65(3):264-73.
109. Chamnan P, Simmons RK, Hori H, et al. A simple risk score using routine data for predicting cardiovascular disease in primary care. *Br J Gen Pract* 2010;60(577):e327-34.
110. Hamer M, Chida Y, Stamatakis E. Utility of C-reactive protein for cardiovascular risk stratification across three age groups in subjects without existing cardiovascular diseases. *Am J Cardiol* 2009;104(4):538-42.
111. Hurley LP, Dickinson LM, Estacio RO, Steiner JF, Havranek EP. Prediction of cardiovascular death in racial/ethnic minorities using Framingham risk factors. *Circ Cardiovasc Qual Outcomes* 2010;3(2):181-7.

112. Khalili D, Hadaegh F, Soori H, Steyerberg EW, Bozorgmanesh M, Azizi F. Clinical usefulness of the Framingham cardiovascular risk profile beyond its statistical performance: the Tehran Lipid and Glucose Study. *Am J Epidemiol* 2012;176(3):177-86.
113. Mohammadreza B, Farzad H, Davoud K, Fereidoun Prof AF. Prognostic significance of the complex "Visceral Adiposity Index" vs. simple anthropometric measures: Tehran lipid and glucose study. *Cardiovasc Diabetol* 2012;11:20.
114. Simmons RK, Coleman RL, Price HC, et al. Performance of the UK Prospective Diabetes Study Risk Engine and the Framingham Risk Equations in Estimating Cardiovascular Disease in the EPIC- Norfolk Cohort. *Diabetes Care* 2009;32(4):708-13.
115. Ito H, Pacold IV, Durazo-Arvizu R, et al. The effect of including cystatin C or creatinine in a cardiovascular risk model for asymptomatic individuals: the multi-ethnic study of atherosclerosis. *Am J Epidemiol* 2011;174(8):949-57.
116. Davies RW, Dandona S, Stewart AFR, et al. Improved prediction of cardiovascular disease based on a panel of single nucleotide polymorphisms identified through genome-wide association studies. *Circ Cardiovasc Genet* 2010;3(5):468-74.
117. Donfrancesco C, Palmieri L, Cooney M-T, et al. Italian cardiovascular mortality charts of the CUORE project: are they comparable with the SCORE charts? *Eur J Cardiovasc Prev Rehabil* 2010;17(4):403-9.
118. Empana JP, Tafflet M, Escolano S, et al. Predicting CHD risk in France: A pooled analysis of the D.E.S.I.R., Three City, PRIME, and SU.VI.MAX studies. *Eur J Cardiovasc Prev Rehabil* 2011;18(2):175-85.
119. Faeh D, Braun J, Rufibach K, Puhan MA, Marques-Vidal P, Bopp M. Population Specific and Up to Date Cardiovascular Risk Charts Can Be Efficiently Obtained with Record Linkage of Routine and Observational Data. *PLoS ONE* 2013;8(2).
120. Folsom AR, Chambless LE, Duncan BB, Gilbert AC, Pankow JS. Prediction of coronary heart disease in middle-aged adults with diabetes. *Diabetes Care* 2003;26(10):2777-84.
121. Friedland DR, Cederberg C, Tarima S. Audiometric pattern as a predictor of cardiovascular status: development of a model for assessment of risk. *Laryngoscope* 2009;119(3):473-86.
122. Gaziano TA, Young CR, Fitzmaurice G, Atwood S, Gaziano JM. Laboratory-based versus non-laboratory-based method for assessment of cardiovascular disease risk: the NHANES I Follow-up Study cohort. *Lancet* 2008;371(9616):923-31.
123. Glynn RJ, L'Italien GJ, Sesso HD, Jackson EA, Buring JE. Development of predictive models for long-term cardiovascular risk associated with systolic and diastolic blood pressure. *Hypertension* 2002;39(1):105-10.
124. Hesse B, Morise A, Pothier CE, Blackstone EH, Lauer MS. Can we reliably predict long-term mortality after exercise testing? An external validation. *Am Heart J* 2005;150(2):307-14.
125. Hippisley-Cox J, Coupland C, Robson J, Brindle P. Derivation, validation, and evaluation of a new QRISK model to estimate lifetime risk of cardiovascular disease: cohort study using QResearch database. *BMJ* 2010;341:c6624.
126. Hoes AW, Grobbee DE, Valkenburg HA, Lubsen J, Hofman A. Cardiovascular risk and all-cause mortality; a 12 year follow-up study in The Netherlands. *Eur J Epidemiol* 1993;9(3):285-92.
127. Houterman S, Boshuizen HC, Verschuren WM, et al. Predicting cardiovascular risk in the elderly in different European countries. *Eur Heart J* 2002;23(4):294-300.
128. Ishikawa S, Matsumoto M, Kayaba K, et al. Risk charts illustrating the 10-year risk of stroke among residents of Japanese rural communities: the JMS Cohort Study. *J Epidemiol* 2009;19(2):101-6.
129. Janssen I, Katzmarzyk PT, Church TS, Blair SN. The Cooper Clinic Mortality Risk Index: clinical score sheet for men. *Am J Prev Med* 2005;29(3):194-203.
130. Kannel WB, McGee D, Gordon T. A general cardiovascular risk profile: the Framingham Study. *Am J Cardiol* 1976;38(1):46-51.

131. Keys A, Aravanis C, Blackburn H, et al. Probability of middle-aged men developing coronary heart disease in five years. *Circulation* 1972;45(4):815-28.
132. Knuiman MW, Vu HT. Prediction of coronary heart disease mortality in Busselton, Western Australia: an evaluation of the Framingham, national health epidemiologic follow up study, and WHO ERICA risk scores. *J Epidemiol Community Health* 1997;51(5):515-9.
133. Knuiman MW, Vu HT, Bartholomew HC. Multivariate risk estimation for coronary heart disease: the Busselton Health Study. *Aust N Z J Public Health* 1998;22(7):747-53.
134. L'Italien G, Ford I, Norrie J, et al. The cardiovascular event reduction tool (CERT)--a simplified cardiac risk prediction model developed from the West of Scotland Coronary Prevention Study (WOSCOPS). *Am J Cardiol* 2000;85(6):720-4.
135. Larson MG. Assessment of cardiovascular risk factors in the elderly: the Framingham Heart Study. *Stat Med* 1995;14(16):1745-56.
136. Leaverton PE, Sorlie PD, Kleinman JC, et al. Representativeness of the Framingham risk model for coronary heart disease mortality: a comparison with a national cohort study. *J Chronic Dis* 1987;40(8):775-84.
137. Lee ET, Howard BV, Wang W, et al. Prediction of coronary heart disease in a population with high prevalence of diabetes and albuminuria: the Strong Heart Study. *Circulation* 2006;113(25):2897-905.
138. Lee J, Heng D, Ma S, Chew S-K, Hughes K, Tai ES. The metabolic syndrome and mortality: the Singapore Cardiovascular Cohort Study. *Clin Endocrinol (Oxf)* 2008;69(2):225-30.
139. Levy D, Wilson PW, Anderson KM, Castelli WP. Stratifying the patient at risk from coronary disease: new insights from the Framingham Heart Study. *Am Heart J* 1990;119(3 Pt 2):712-7; discussion 17.
140. Liu J, Hong Y, D'Agostino RB, Sr., et al. Predictive value for the Chinese population of the Framingham CHD risk assessment tool compared with the Chinese Multi-Provincial Cohort Study. *JAMA* 2004;291(21):2591-9.
141. Lloyd-Jones DM, Leip EP, Larson MG, et al. Prediction of lifetime risk for cardiovascular disease by risk factor burden at 50 years of age. *Circulation* 2006;113(6):791-8.
142. Lumley T, Kronmal RA, Cushman M, Manolio TA, Goldstein S. A stroke prediction score in the elderly: validation and Web-based application. *J Clin Epidemiol* 2002;55(2):129-36.
143. Voko Z, Hollander M, Koudstaal PJ, Hofman A, Breteler MMB. How do American stroke risk functions perform in a Western European population? *Neuroepidemiology* 2004;23(5):247-53.
144. Macfarlane PW, Norrie J. The value of the electrocardiogram in risk assessment in primary prevention: Experience from the West of Scotland Coronary Prevention Study. *J Electrocardiol* 2007;40(1):101-09.
145. Mannan H, Stevenson C, Peeters A, Walls H, McNeil J. Framingham risk prediction equations for incidence of cardiovascular disease using detailed measures for smoking. *Heart International* 2010;5(2):e11.
146. Mannan HR, Stevenson CE, Peeters A, Walls HL, McNeil JJ. Age at quitting smoking as a predictor of risk of cardiovascular disease incidence independent of smoking status, time since quitting and pack-years. *BMC Research Notes* 2011;4:39.
147. Mannan HR, Stevenson CE, Peeters A, McNeil JJ. A new set of risk equations for predicting long term risk of all-cause mortality using cardiovascular risk factors. *Prev Med* 2013;56(1):41-45.
148. Matsumoto M, Ishikawa S, Kayaba K, et al. Risk charts illustrating the 10-year risk of myocardial infarction among residents of Japanese rural communities: the JMS Cohort Study. *J Epidemiol* 2009;19(2):94-100.
149. May M, Sterne JAC, Shipley M, et al. A coronary heart disease risk model for predicting the effect of potent antiretroviral therapy in HIV-1 infected men. *Int J Epidemiol* 2007;36(6):1309-18.

150. McGorrian C, Yusuf S, Islam S, et al. Estimating modifiable coronary heart disease risk in multiple regions of the world: the INTERHEART Modifiable Risk Score. *Eur Heart J* 2011;32(5):581-9.
151. McNeil JJ, Peeters A, Liew D, Lim S, Vos T. A model for predicting the future incidence of coronary heart disease within percentiles of coronary heart disease risk. *J Cardiovasc Risk* 2001;8(1):31-7.
152. Menotti A, Keys A, Kromhout D, et al. Twenty-five-year mortality from coronary heart disease and its prediction in five cohorts of middle-aged men in Finland, The Netherlands, and Italy. *Prev Med* 1990;19(3):270-8.
153. Menotti A, Farchi G, Seccareccia F. The prediction of coronary heart disease mortality as a function of major risk factors in over 30 000 men in the Italian RIFLE pooling Project. A comparison with the MRFIT primary screenees. The RIFLE research group. *J Cardiovasc Risk* 1994;1(3):263-70.
154. Menotti A, Lanti M, Puddu PE, et al. First risk functions for prediction of coronary and cardiovascular disease incidence in the Gubbio Population Study. *Ital Heart J* 2000;1(6):394-9.
155. Menotti A, Lanti M, Puddu PE, et al. The risk functions incorporated in Riscard 2002: a software for the prediction of cardiovascular risk in the general population based on Italian data. *Ital Heart J* 2002;3(2):114-21.
156. Menotti A, Lanti M, Agabiti-Rosei E, et al. Riskard 2005. New tools for prediction of cardiovascular disease risk derived from Italian population studies. *Nutr Metab Cardiovasc Dis* 2005;15(6):426-40.
157. Moons KG, Bots ML, Salonen JT, et al. Prediction of stroke in the general population in Europe (EUROSTROKE): Is there a role for fibrinogen and electrocardiography? *J Epidemiol Community Health* 2002;56 Suppl 1:i30-6.
158. Nippon Data Research Group. Risk assessment chart for death from cardiovascular disease based on a 19-year follow-up study of a Japanese representative population. *Circ J* 2006;70(10):1249-55.
159. Noda H, Maruyama K, Iso H, et al. Prediction of myocardial infarction using coronary risk scores among Japanese male workers: 3M Study. *J Atheroscler Thromb* 2010;17(5):452-9.
160. Nordestgaard BG, Adourian AS, Freiberg JJ, Guo Y, Muntendam P, Falk E. Risk factors for near-term myocardial infarction in apparently healthy men and women. *Clin Chem* 2010;56(4):559-67.
161. Odell PM, Anderson KM, Kannel WB. New models for predicting cardiovascular events. *J Clin Epidemiol* 1994;47(6):583-92.
162. Onat A, Can G, Hergenc G, Ugur M, Yuksel H. Coronary disease risk prediction algorithm warranting incorporation of C-reactive protein in Turkish adults, manifesting sex difference. *Nutr Metab Cardiovasc Dis* 2012;22(8):643-50.
163. Pencina MJ, D'Agostino RB, Sr., Larson MG, Massaro JM, Vasan RS. Predicting the 30-year risk of cardiovascular disease: the framingham heart study. *Circulation* 2009;119(24):3078-84.
164. Petersson U, Ostgren CJ, Brudin L, Nilsson PM. A consultation-based method is equal to SCORE and an extensive laboratory-based method in predicting risk of future cardiovascular disease. *Eur J Cardiovasc Prev Rehabil* 2009;16(5):536-40.
165. Plichart M, Celermajer DS, Zureik M, et al. Carotid intima-media thickness in plaque-free site, carotid plaques and coronary heart disease risk prediction in older adults. The Three-City Study. *Atherosclerosis* 2011;219(2):917-24.
166. Pocock SJ, McCormack V, Gueyffier F, Boutitie F, Fagard RH, Boissel JP. A score for predicting risk of death from cardiovascular disease in adults with raised blood pressure, based on individual patient data from randomised controlled trials. *BMJ* 2001;323(7304):75-81.
167. Polonsky TS, McClelland RL, Jorgensen NW, et al. Coronary artery calcium score and risk classification for coronary heart disease prediction. *JAMA* 2010;303(16):1610-6.

168. Prati P, Tosetto A, Casaroli M, et al. Carotid plaque morphology improves stroke risk prediction: usefulness of a new ultrasonographic score. *Cerebrovasc Dis* 2011;31(3):300-4.
169. Qiao Q, Gao W, Laatikainen T, Vartiainen E. Layperson-oriented vs. clinical-based models for prediction of incidence of ischemic stroke: National FINRISK Study. *Int J Stroke* 2012;7(8):662-68.
170. Schnabel RB, Sullivan LM, Levy D, et al. Development of a risk score for atrial fibrillation (Framingham Heart Study): a community-based cohort study. *Lancet* 2009;373(9665):739-45.
171. Shaper AG, Pocock SJ, Phillips AN, Walker M. Identifying men at high risk of heart attacks: strategy for use in general practice. *Br Med J (Clin Res Ed)* 1986;293(6545):474-9.
172. Smith JG, Newton-Cheh C, Almgren P, et al. Assessment of conventional cardiovascular risk factors and multiple biomarkers for the prediction of incident heart failure and atrial fibrillation. *J Am Coll Cardiol* 2010;56(21):1712-9.
173. Tanabe N, Iso H, Okada K, et al. Serum total and non-high-density lipoprotein cholesterol and the risk prediction of cardiovascular events - the JALS-ECC. *Circ J* 2010;74(7):1346-56.
174. Teramoto T, Ohashi Y, Nakaya N, et al. Practical risk prediction tools for coronary heart disease in mild to moderate hypercholesterolemia in Japan: originated from the MEGA study data. *Circ J* 2008;72(10):1569-75.
175. Thomsen TF, Davidsen M, Ibsen H, Jorgensen T, Jensen G, Borch-Johnsen K. A new method for CHD prediction and prevention based on regional risk scores and randomized clinical trials; PRECARD and the Copenhagen Risk Score. *J Cardiovasc Risk* 2001;8(5):291-7.
176. Thorsen RD, Jacobs DR, Jr., Grimm RH, Jr., Keys A, Taylor H, Blackburn H. Preventive cardiology in practice: a device for risk estimation and counseling in coronary disease. *Prev Med* 1979;8(5):548-56.
177. Truett J, Cornfield J, Kannel W. A multivariate analysis of the risk of coronary heart disease in Framingham. *J Chronic Dis* 1967;20(7):511-24.
178. Tsang TS, Barnes ME, Gersh BJ, et al. Prediction of risk for first age-related cardiovascular events in an elderly population: the incremental value of echocardiography. *J Am Coll Cardiol* 2003;42(7):1199-205.
179. Tunstall-Pedoe H. The Dundee coronary risk-disk for management of change in risk factors. *BMJ* 1991;303(6805):744-7.
180. Vergnaud AC, Bertrais S, Galan P, Herberg S, Czernichow S. Ten-year risk prediction in French men using the Framingham coronary score: results from the national SU.VI.MAX cohort. *Prev Med* 2008;47(1):61-5.
181. Voss R, Cullen P, Schulte H, Assmann G. Prediction of risk of coronary events in middle-aged men in the Prospective Cardiovascular Munster Study (PROCAM) using neural networks. *Int J Epidemiol* 2002;31(6):1253-62; discussion 62-64.
182. Stork S, Feelders RA, van den Beld AW, et al. Prediction of mortality risk in the elderly. *Am J Med* 2006;119(6):519-25.
183. Wilson PW, Castelli WP, Kannel WB. Coronary risk prediction in adults (the Framingham Heart Study). *Am J Cardiol* 1987;59(14):91G-94G.
184. Wilson PW, D'Agostino RB, Levy D, Belanger AM, Silbershatz H, Kannel WB. Prediction of coronary heart disease using risk factor categories. *Circulation* 1998;97(18):1837-47.
185. Asselbergs FW, Hillege HL, van Gilst WH. Framingham score and microalbuminuria: combined future targets for primary prevention? *Kidney Int Suppl* 2004(92):S111-4.
186. Baxi NS, Jackson JL, Ritter J, Sessums LL. How well do the Framingham risk factors correlate with diagnoses of ischemic heart disease and cerebrovascular disease in a military beneficiary cohort? *Mil Med* 2011;176(4):408-13.
187. Buitrago F, Calvo-Hueros JI, Canon-Barroso L, et al. Original and REGICOR Framingham functions in a nondiabetic population of a Spanish health care center: a validation study. *Ann Fam Med* 2011;9(5):431-8.

188. D'Agostino RB, Sr., Grundy S, Sullivan LM, Wilson P. Validation of the Framingham coronary heart disease prediction scores: results of a multiple ethnic groups investigation. *JAMA* 2001;286(2):180-7.
189. Drawz PE, Baraniuk S, Davis BR, et al. Cardiovascular risk assessment: addition of CKD and race to the Framingham equation. *Am Heart J* 2012;164(6):925-31.e2.
190. Hsia J, Rodabough RJ, Manson JE, et al. Evaluation of the American Heart Association cardiovascular disease prevention guideline for women. *Circ Cardiovasc Qual Outcomes* 2010;3(2):128-34.
191. Lloyd-Jones DM, Wilson PWF, Larson MG, et al. Framingham risk score and prediction of lifetime risk for coronary heart disease. *Am J Cardiol* 2004;94(1):20-4.
192. Marrugat J, D'Agostino R, Sullivan L, et al. An adaptation of the Framingham coronary heart disease risk function to European Mediterranean areas. *J Epidemiol Community Health* 2003;57(8):634-8.
193. Marrugat J, Solanas P, D'Agostino R, et al. Coronary risk estimation in Spain using a calibrated Framingham function. *Rev Esp Cardiol* 2003;56(3):253-61.
194. Marrugat J, Subirana I, Comin E, et al. Validity of an adaptation of the Framingham cardiovascular risk function: The VERIFICA study. *J Epidemiol Community Health* 2007;61(1):40-47.
195. Park Y, Lim J, Lee J, Kim SG. Erythrocyte fatty acid profiles can predict acute non-fatal myocardial infarction. *Br J Nutr* 2009;102(9):1355-61.
196. Polak JF, Pencina MJ, Pencina KM, O'Donnell CJ, Wolf PA, D'Agostino RB, Sr. Carotid-wall intima-media thickness and cardiovascular events. *N Engl J Med* 2011;365(3):213-21.
197. Rana JS, Cote M, Despres JP, et al. Inflammatory biomarkers and the prediction of coronary events among people at intermediate risk: the EPIC-Norfolk prospective population study. *Heart* 2009;95(20):1682-7.
198. Reissigova J, Zvarova J. The Framingham risk function underestimated absolute coronary heart disease risk in Czech men. *Methods Inf Med* 2007;46(1):43-9.
199. Rodondi N, Locatelli I, Aujesky D, et al. Framingham risk score and alternatives for prediction of coronary heart disease in older adults. *PLoS ONE* 2012;7(3):e34287.
200. Simmons RK, Sharp S, Boekholdt SM, et al. Evaluation of the Framingham risk score in the European Prospective Investigation of Cancer-Norfolk cohort: does adding glycated hemoglobin improve the prediction of coronary heart disease events? *Arch Intern Med* 2008;168(11):1209-16.
201. Stern MP, Williams K, Gonzalez-Villalpando C, Hunt KJ, Haffner SM. Does the metabolic syndrome improve identification of individuals at risk of type 2 diabetes and/or cardiovascular disease? *Diabetes Care* 2004;27(11):2676-81.
202. Suka M, Sugimori H, Yoshida K. Application of the updated Framingham risk score to Japanese men. *Hypertens Res* 2001;24(6):685-9.
203. Tohidi M, Hadaegh F, Harati H, Azizi F. C-reactive protein in risk prediction of cardiovascular outcomes: Tehran Lipid and Glucose Study. *Int J Cardiol* 2009;132(3):369-74.
204. Vaidya D, Yanek LR, Moy TF, Pearson TA, Becker LC, Becker DM. Incidence of coronary artery disease in siblings of patients with premature coronary artery disease: 10 years of follow-up. *Am J Cardiol* 2007;100(9):1410-5.
205. Weiner DE, Tighiouart H, Griffith JL, et al. Kidney disease, Framingham risk scores, and cardiac and mortality outcomes. *Am J Med* 2007;120(6):552.e1-8.
206. Wolf PA, D'Agostino RB, Belanger AJ, Kannel WB. Probability of stroke: a risk profile from the Framingham Study. *Stroke* 1991;22(3):312-8.
207. Poels MMF, Steyerberg EW, Wieberdink RG, et al. Assessment of cerebral small vessel disease predicts individual stroke risk. *J Neurol Neurosurg Psychiatry* 2012;83(12):1174-9.
208. Truelsen T, Lindenstrom E, Boysen G. Comparison of probability of stroke between the Copenhagen City Heart Study and the Framingham Study. *Stroke* 1994;25(4):802-7.

209. Wu Y, Liu X, Li X, et al. Estimation of 10-year risk of fatal and nonfatal ischemic cardiovascular diseases in Chinese adults. *Circulation* 2006;114(21):2217-25.
210. Wu Y, Zhang L, Yuan X, Wu Y, Yi D. Quantifying links between stroke and risk factors: a study on individual health risk appraisal of stroke in a community of Chongqing. *Neurol Sci* 2011;32(2):211-9.
211. Yip YB, Wong TKS, Chung JWY, Ko SKK, Sit JWH, Chan TMF. Cardiovascular disease: application of a composite risk index from the Telehealth System in a district community. *Public Health Nurs* 2004;21(6):524-32.
212. Diverse Populations Collaborative Group. Prediction of mortality from coronary heart disease among diverse populations: is there a common predictive function? *Heart* 2002;88(3):222-8.
